# Supplementary material for: Proteome Profiling of Urinary Exosomes Identifies Alpha 1-Antitrypsin and H2B1K as Diagnostic and Prognostic Biomarkers for Urothelial Carcinoma
Source: PubMed Central journal article supplement (PMC5043375; doi:10.1038/srep34446), 2016-09-30
Supplement: srep34446-s1.pdf [file srep34446-s1.pdf]

# **Proteome Profiling of Urinary Exosomes Identifies Alpha 1-Antitrypsin and H2B1K as Diagnostic and Prognostic Biomarkers for Urothelial Carcinoma**

Shih-Yi Lin, MD<sup>a,b,c</sup>, Chao-Hsiang Chang<sup>d</sup>, His-Chin Wu<sup>d</sup>, Ching-Chan Lin<sup>a,e</sup>, Kai-Po Chang<sup>f</sup>, Chi-Rei Yang<sup>d</sup>, Chi-Ping Huang<sup>a,d</sup>, Wu-Huei Hsu<sup>a,b,g</sup>, Chiz-Tzung Chang<sup>a,b,c</sup>, Chao-Jung Chen<sup>h,i</sup>

<sup>a</sup>Institute of Clinical Medical Science, China Medical University College of Medicine, Taichung, Taiwan

<sup>b</sup>Department of Internal Medicine, China Medical University Hospital, Taichung, Taiwan

<sup>c</sup>Division of Nephrology and Kidney Institute, China Medical University Hospital, Taichung, Taiwan

<sup>d</sup>Department of Urology, China Medical University Hospital, Taichung, Taiwan

<sup>e</sup>Department of Hematology, China Medical University Hospital, Taichung, Taiwan

<sup>f</sup>Department of Pathology, China Medical University Hospital, Taichung, Taiwan

<sup>g</sup>Department of Chest Medicine, China Medical University Hospital, Taichung, Taiwan

<sup>h</sup>Graduate Institute of Integrated Medicine, China Medical University, Taichung, Taiwan

<sup>i</sup>Proteomics Core Laboratory, Department of Medical Research, China Medical University Hospital, Taichung, Taiwan

Corresponding author\*

Chao-Jung Chen, Ph.D.

Associate Professor

Graduate institute of integrated medicine

China Medical University

91, Hsueh-Shih Rd, Taichung, Taiwan, R.O.C

E-mail: cjchen@mail.cmu.edu.tw

Tel: 886-4-22052121

Keywords: Exosome biomarker, Urothelial carcinoma, Matrix-assisted laser desorption/ionization time-of-flight mass spectrometry, Prognostic

**Supplementary table 1 List of identified urinary exosomes protein**

| Accession   | Protein                                                                                | MW<br>[kDa] | pI  | Scores                 | SC [%] |
|-------------|----------------------------------------------------------------------------------------|-------------|-----|------------------------|--------|
| ZBT45_HUMAN | Zinc finger and BTB domain-containing protein 45 OS=Homo sapiens GN=ZBTB45 PE=2 SV=1   | 54.0        | 6.5 | 32.0 (M:32.0)          | 1.4    |
| ZA2G_HUMAN  | Zinc-alpha-2-glycoprotein OS=Homo sapiens GN=AZGP1 PE=1 SV=2                           | 34.2        | 5.7 | 228.6<br>(M:228.6)     | 19.8   |
| YIPF3_HUMAN | Protein YIPF3 OS=Homo sapiens GN=YIPF3 PE=1 SV=1                                       | 38.2        | 5.4 | 28.8 (M:28.8)          | 2.9    |
| VTNC_HUMAN  | Vitronectin OS=Homo sapiens GN=VTN PE=1 SV=1                                           | 54.3        | 5.5 | 400.0<br>(M:400.0)     | 12.1   |
| VPS4A_HUMAN | Vacuolar protein sorting-associated protein 4A OS=Homo sapiens GN=VPS4A PE=1 SV=1      | 48.9        | 8.6 | 77.7 (M:77.7)          | 5.3    |
| VMO1_HUMAN  | Vitelline membrane outer layer protein 1 homolog OS=Homo sapiens GN=VMO1 PE=1 SV=1     | 21.5        | 4.8 | 53.1 (M:53.1)          | 5.9    |
| VIME_HUMAN  | Vimentin OS=Homo sapiens GN=VIM PE=1 SV=4                                              | 53.6        | 4.9 | 55.6 (M:55.6)          | 4.1    |
| VDAC2_HUMAN | Voltage-dependent anion-selective channel protein 2 OS=Homo sapiens GN=VDAC2 PE=1 SV=2 | 31.5        | 8.7 | 50.3 (M:50.3)          | 4.1    |
| VDAC1_HUMAN | Voltage-dependent anion-selective channel protein 1 OS=Homo sapiens GN=VDAC1 PE=1 SV=2 | 30.8        | 9.2 | 207.0<br>(M:207.0)     | 18.7   |
| VATE1_HUMAN | V-type proton ATPase subunit E 1 OS=Homo sapiens GN=ATP6V1E1 PE=1 SV=1                 | 26.1        | 8.8 | 54.7 (M:54.7)          | 4.9    |
| VATB1_HUMAN | V-type proton ATPase subunit B, kidney isoform OS=Homo sapiens GN=ATP6V1B1 PE=1 SV=3   | 56.8        | 5.3 | 56.1 (M:56.1)          | 4.3    |
| VATA_HUMAN  | V-type proton ATPase catalytic subunit A OS=Homo sapiens GN=ATP6V1A PE=1 SV=2          | 68.3        | 5.2 | 109.6<br>(M:109.6)     | 4.7    |
| VAT1_HUMAN  | Synaptic vesicle membrane protein VAT-1 homolog OS=Homo sapiens GN=VAT1 PE=1 SV=2      | 41.9        | 5.9 | 35.8 (M:35.8)          | 2.5    |
| UTER_HUMAN  | Uteroglobin OS=Homo sapiens GN=SCGB1A1 PE=1 SV=1                                       | 10.0        | 4.8 | 48.8 (M:48.8)          | 11.0   |
| UROM_HUMAN  | Uromodulin OS=Homo sapiens GN=UMOD PE=1 SV=1                                           | 69.7        | 4.9 | 44663.8<br>(M:44663.8) | 46.7   |
| UPK3A_HUMAN | Uroplakin-3a OS=Homo sapiens GN=UPK3A PE=1 SV=3                                        | 30.7        | 4.5 | 51.3 (M:51.3)          | 8.0    |
| UPK1A_HUMAN | Uroplakin-1a OS=Homo sapiens GN=UPK1A PE=2 SV=1                                        | 28.9        | 5.0 | 45.9 (M:45.9)          | 8.9    |
| TTHY_HUMAN  | Transthyretin OS=Homo sapiens GN=TTR PE=1 SV=1                                         | 15.9        | 5.4 | 481.5<br>(M:481.5)     | 33.3   |
| TSN1_HUMAN  | Tetraspanin-1 OS=Homo sapiens GN=TSPAN1 PE=1 SV=2                                      | 26.3        | 5.0 | 265.3<br>(M:265.3)     | 5.4    |
| TS101_HUMAN | Tumor susceptibility gene 101 protein OS=Homo sapiens GN=TSG101 PE=1 SV=2              | 43.9        | 6.0 | 41.6 (M:41.6)          | 2.6    |
| TRFL_HUMAN  | Lactotransferrin OS=Homo sapiens GN=LTF PE=1 SV=6                                      | 78.1        | 9.6 | 1155.2<br>(M:1155.2)   | 38.3   |
| TRFE_HUMAN  | Serotransferrin OS=Homo sapiens GN=TF PE=1 SV=3                                        | 77.0        | 7.0 | 389.9<br>(M:389.9)     | 9.5    |
| TPP1_HUMAN  | Tripeptidyl-peptidase 1 OS=Homo sapiens GN=TPP1 PE=1                                   | 61.2        | 6.0 | 203.5                  | 7.5    |

|             |                                                                                |       |      |               |  |           |  |
|-------------|--------------------------------------------------------------------------------|-------|------|---------------|--|-----------|--|
|             | SV=2                                                                           |       |      |               |  | (M:203.5) |  |
| TPIS_HUMAN  | Triosephosphate isomerase OS=Homo sapiens GN=TPI1 PE=1                         | 30.8  | 5.6  | 293.6         |  | 28.3      |  |
|             | SV=3                                                                           |       |      | (M:293.6)     |  |           |  |
| TM256_HUMA  | Transmembrane protein 256 OS=Homo sapiens                                      | 11.7  | 9.9  | 145.2         |  | 24.8      |  |
| N           | GN=TMEM256 PE=2 SV=1                                                           |       |      | (M:145.2)     |  |           |  |
| TIMP1_HUMAN | Metalloproteinase inhibitor 1 OS=Homo sapiens GN=TIMP1                         | 23.2  | 9.8  | 70.2 (M:70.2) |  | 17.9      |  |
|             | PE=1 SV=1                                                                      |       |      |               |  |           |  |
| THTM_HUMAN  | 3-mercaptopyruvate sulfurtransferase OS=Homo sapiens                           | 33.2  | 6.1  | 218.6         |  | 18.9      |  |
|             | GN=MPST PE=1 SV=3                                                              |       |      | (M:218.6)     |  |           |  |
| THRB_HUMAN  | Prothrombin OS=Homo sapiens GN=F2 PE=1 SV=2                                    | 70.0  | 5.6  | 135.7         |  | 6.3       |  |
|             |                                                                                |       |      | (M:135.7)     |  |           |  |
| THIL_HUMAN  | Acetyl-CoA acetyltransferase, mitochondrial OS=Homo sapiens GN=ACAT1 PE=1 SV=1 | 45.2  | 9.6  | 93.5 (M:93.5) |  | 5.9       |  |
| TENX_HUMAN  | Tenascin-X OS=Homo sapiens GN=TNXB PE=1 SV=3                                   | 464.0 | 5.1  | 70.4 (M:70.4) |  | 0.2       |  |
| TBB4A_HUMA  | Tubulin beta-4A chain OS=Homo sapiens GN=TUBB4A PE=1                           | 49.6  | 4.6  | 165.5         |  | 8.1       |  |
| N           | SV=2                                                                           |       |      | (M:165.5)     |  |           |  |
| TBA1A_HUMA  | Tubulin alpha-1A chain OS=Homo sapiens GN=TUBA1A                               | 50.1  | 4.8  | 96.8 (M:96.8) |  | 3.3       |  |
| N           | PE=1 SV=1                                                                      |       |      |               |  |           |  |
| SYPL1_HUMA  | Synaptophysin-like protein 1 OS=Homo sapiens GN=SYPL1                          | 28.5  | 9.5  | 47.8 (M:47.8) |  | 4.2       |  |
| N           | PE=1 SV=1                                                                      |       |      |               |  |           |  |
| SUSD2_HUMA  | Sushi domain-containing protein 2 OS=Homo sapiens                              | 90.1  | 5.8  | 40.3 (M:40.3) |  | 5.1       |  |
| N           | GN=SUSD2 PE=1 SV=1                                                             |       |      |               |  |           |  |
| STOM_HUMAN  | Erythrocyte band 7 integral membrane protein OS=Homo sapiens GN=STOM PE=1 SV=3 | 31.7  | 8.9  | 176.5         |  | 16.7      |  |
|             |                                                                                |       |      | (M:176.5)     |  |           |  |
| SPIT3_HUMAN | Kunitz-type protease inhibitor 3 OS=Homo sapiens                               | 10.2  | 7.2  | 50.2 (M:50.2) |  | 19.1      |  |
|             | GN=SPINT3 PE=2 SV=3                                                            |       |      |               |  |           |  |
| SPEB_HUMAN  | Agmatinase, mitochondrial OS=Homo sapiens GN=AGMAT                             | 37.6  | 8.9  | 76.0 (M:76.0) |  | 14.2      |  |
|             | PE=1 SV=2                                                                      |       |      |               |  |           |  |
| SORCN_HUMA  | Sorcini OS=Homo sapiens GN=SRI PE=1 SV=1                                       | 21.7  | 5.2  | 63.5 (M:63.5) |  | 8.1       |  |
| N           |                                                                                |       |      |               |  |           |  |
| SODM_HUMAN  | Superoxide dismutase [Mn], mitochondrial OS=Homo sapiens                       | 24.7  | 9.1  | 84.9 (M:84.9) |  | 10.4      |  |
|             | GN=SOD2 PE=1 SV=2                                                              |       |      |               |  |           |  |
| SODC_HUMAN  | Superoxide dismutase [Cu-Zn] OS=Homo sapiens GN=SOD1                           | 15.9  | 5.7  | 52.8 (M:52.8) |  | 9.1       |  |
|             | PE=1 SV=2                                                                      |       |      |               |  |           |  |
| SLPI_HUMAN  | Antileukoproteinase OS=Homo sapiens GN=SLPI PE=1 SV=2                          | 14.3  | 10.7 | 50.0 (M:50.0) |  | 9.1       |  |
| SEMG2_HUMA  | Semenogelin-2 OS=Homo sapiens GN=SEMG2 PE=1 SV=1                               | 65.4  | 9.6  | 4842.5        |  | 48.1      |  |
| N           |                                                                                |       |      | (M:4842.5)    |  |           |  |
| SEMG1_HUMA  | Semenogelin-1 OS=Homo sapiens GN=SEMG1 PE=1 SV=2                               | 52.1  | 9.7  | 4545.0        |  | 48.1      |  |
| N           |                                                                                |       |      | (M:4545.0)    |  |           |  |
| SDCB1_HUMA  | Syntenin-1 OS=Homo sapiens GN=SDCBP PE=1 SV=1                                  | 32.4  | 7.9  | 339.6         |  | 22.8      |  |
| N           |                                                                                |       |      | (M:339.6)     |  |           |  |
| SDC4_HUMAN  | Syndecan-4 OS=Homo sapiens GN=SDC4 PE=1 SV=2                                   | 21.6  | 4.2  | 193.3         |  | 12.1      |  |
|             |                                                                                |       |      | (M:193.3)     |  |           |  |
| SDC1_HUMAN  | Syndecan-1 OS=Homo sapiens GN=SDC1 PE=1 SV=3                                   | 32.4  | 4.4  | 141.0         |  | 5.5       |  |
|             |                                                                                |       |      | (M:141.0)     |  |           |  |

|             |                                                            |       |      |               |      |
|-------------|------------------------------------------------------------|-------|------|---------------|------|
| SCTM1_HUMA  | Secreted and transmembrane protein 1 OS=Homo sapiens       | 27.0  | 7.9  | 108.9         | 14.1 |
| N           | GN=SECTM1 PE=1 SV=2                                        |       |      | (M:108.9)     |      |
| SC5AA_HUMA  | Sodium/glucose cotransporter 5 OS=Homo sapiens             | 64.3  | 8.7  | 142.6         | 4.2  |
| N           | GN=SLC5A10 PE=1 SV=2                                       |       |      | (M:142.6)     |      |
| SAP_HUMAN   | Proactivator polypeptide OS=Homo sapiens GN=PSAP PE=1      | 58.1  | 4.9  | 217.8         | 6.7  |
|             | SV=2                                                       |       |      | (M:217.8)     |      |
| SAP3_HUMAN  | Ganglioside GM2 activator OS=Homo sapiens GN=GM2A          | 20.8  | 5.0  | 200.5         | 25.9 |
|             | PE=1 SV=4                                                  |       |      | (M:200.5)     |      |
| SAMP_HUMAN  | Serum amyloid P-component OS=Homo sapiens GN=APCS          | 25.4  | 6.1  | 74.1 (M:74.1) | 9.0  |
|             | PE=1 SV=2                                                  |       |      |               |      |
| SAA2_HUMAN  | Serum amyloid A-2 protein OS=Homo sapiens GN=SAA2          | 13.5  | 9.7  | 260.3         | 36.1 |
|             | PE=1 SV=1                                                  |       |      | (M:260.3)     |      |
| SAA1_HUMAN  | Serum amyloid A-1 protein OS=Homo sapiens GN=SAA1          | 13.5  | 6.4  | 340.3         | 53.3 |
|             | PE=1 SV=1                                                  |       |      | (M:340.3)     |      |
| S12A1_HUMAN | Solute carrier family 12 member 1 OS=Homo sapiens          | 121.4 | 7.8  | 134.6         | 4.1  |
|             | GN=SLC12A1 PE=1 SV=2                                       |       |      | (M:134.6)     |      |
| S10AB_HUMA  | Protein S100-A11 OS=Homo sapiens GN=S100A11 PE=1           | 11.7  | 7.5  | 192.8         | 15.2 |
| N           | SV=2                                                       |       |      | (M:192.8)     |      |
| S10AA_HUMA  | Protein S100-A10 OS=Homo sapiens GN=S100A10 PE=1           | 11.2  | 7.7  | 42.0 (M:42.0) | 17.5 |
| N           | SV=2                                                       |       |      |               |      |
| S10A9_HUMAN | Protein S100-A9 OS=Homo sapiens GN=S100A9 PE=1 SV=1        | 13.2  | 5.7  | 398.9         | 24.6 |
|             |                                                            |       |      | (M:398.9)     |      |
| S10A8_HUMAN | Protein S100-A8 OS=Homo sapiens GN=S100A8 PE=1 SV=1        | 10.8  | 6.6  | 125.7         | 31.2 |
|             |                                                            |       |      | (M:125.7)     |      |
| S10A6_HUMAN | Protein S100-A6 OS=Homo sapiens GN=S100A6 PE=1 SV=1        | 10.2  | 5.2  | 45.2 (M:45.2) | 7.8  |
| RS27A_HUMA  | Ubiquitin-40S ribosomal protein S27a OS=Homo sapiens       | 18.0  | 10.4 | 173.1         | 16.0 |
| N           | GN=RPS27A PE=1 SV=2                                        |       |      | (M:173.1)     |      |
| RS18_HUMAN  | 40S ribosomal protein S18 OS=Homo sapiens GN=RPS18         | 17.7  | 11.5 | 51.8 (M:51.8) | 10.5 |
|             | PE=1 SV=3                                                  |       |      |               |      |
| RHOA_HUMAN  | Transforming protein RhoA OS=Homo sapiens GN=RHOA          | 21.8  | 5.8  | 129.4         | 14.0 |
|             | PE=1 SV=1                                                  |       |      | (M:129.4)     |      |
| RGPA2_HUMA  | Ral GTPase-activating protein subunit alpha-2 OS=Homo      | 210.6 | 5.7  | 28.5 (M:28.5) | 0.4  |
| N           | sapiens GN=RALGAPA2 PE=1 SV=2                              |       |      |               |      |
| RETN_HUMAN  | Resistin OS=Homo sapiens GN=RETN PE=2 SV=1                 | 11.4  | 7.7  | 82.7 (M:82.7) | 10.2 |
| RET5_HUMAN  | Retinol-binding protein 5 OS=Homo sapiens GN=RBP5 PE=1     | 15.9  | 6.1  | 70.1 (M:70.1) | 6.7  |
|             | SV=3                                                       |       |      |               |      |
| RET4_HUMAN  | Retinol-binding protein 4 OS=Homo sapiens GN=RBP4 PE=1     | 23.0  | 5.7  | 1174.1        | 29.4 |
|             | SV=3                                                       |       |      | (M:1174.1)    |      |
| RASL2_HUMA  | Ras GTPase-activating protein 4 OS=Homo sapiens            | 90.4  | 9.0  | 27.4 (M:27.4) | 0.9  |
| N           | GN=RASA4 PE=2 SV=2                                         |       |      |               |      |
| RAP1A_HUMA  | Ras-related protein Rap-1A OS=Homo sapiens GN=RAP1A        | 21.0  | 7.2  | 146.6         | 13.6 |
| N           | PE=1 SV=1                                                  |       |      | (M:146.6)     |      |
| RADI_HUMAN  | Radixin OS=Homo sapiens GN=RDX PE=1 SV=1                   | 68.5  | 6.0  | 681.4         | 17.5 |
|             |                                                            |       |      | (M:681.4)     |      |
| RAC1_HUMAN  | Ras-related C3 botulinum toxin substrate 1 OS=Homo sapiens | 21.4  | 9.7  | 126.3         | 32.8 |

|             |                                                                                            |      |      |                   |      |
|-------------|--------------------------------------------------------------------------------------------|------|------|-------------------|------|
|             | GN=RAC1 PE=1 SV=1                                                                          |      |      | (M:126.3)         |      |
| RAB10_HUMAN | Ras-related protein Rab-10 OS=Homo sapiens GN=RAB10 PE=1 SV=1                              | 22.5 | 9.4  | 58.3 (M:58.3)     | 5.5  |
| QSOX1_HUMAN | Sulfhydryl oxidase 1 OS=Homo sapiens GN=QSOX1 PE=1 SV=3                                    | 82.5 | 9.9  | 31.0 (M:31.0)     | 1.1  |
| QOR_HUMAN   | Quinone oxidoreductase OS=Homo sapiens GN=CRYZ PE=1 SV=1                                   | 35.2 | 9.2  | 47.7 (M:47.7)     | 4.3  |
| PTGDS_HUMAN | Prostaglandin-H2 D-isomerase OS=Homo sapiens GN=PTGDS PE=1 SV=1                            | 21.0 | 8.9  | 217.9 (M:217.9)   | 17.4 |
| PSCA_HUMAN  | Prostate stem cell antigen OS=Homo sapiens GN=PSCA PE=1 SV=1                               | 12.9 | 4.9  | 80.2 (M:80.2)     | 14.6 |
| PRTN3_HUMAN | Myeloblastin OS=Homo sapiens GN=PRTN3 PE=1 SV=3                                            | 27.8 | 10.3 | 36.3 (M:36.3)     | 4.7  |
| PROM1_HUMAN | Prominin-1 OS=Homo sapiens GN=PROM1 PE=1 SV=1                                              | 97.1 | 7.2  | 261.0 (M:261.0)   | 7.9  |
| PROF1_HUMAN | Profilin-1 OS=Homo sapiens GN=PFN1 PE=1 SV=2                                               | 15.0 | 9.4  | 121.6 (M:121.6)   | 30.0 |
| PRDX6_HUMAN | Peroxiredoxin-6 OS=Homo sapiens GN=PRDX6 PE=1 SV=3                                         | 25.0 | 6.0  | 28.8 (M:28.8)     | 5.4  |
| PRDX5_HUMAN | Peroxiredoxin-5, mitochondrial OS=Homo sapiens GN=PRDX5 PE=1 SV=4                          | 22.1 | 9.9  | 51.1 (M:51.1)     | 15.9 |
| PRDX3_HUMAN | Thioredoxin-dependent peroxide reductase, mitochondrial OS=Homo sapiens GN=PRDX3 PE=1 SV=3 | 27.7 | 8.9  | 59.8 (M:59.8)     | 9.0  |
| PRDX1_HUMAN | Peroxiredoxin-1 OS=Homo sapiens GN=PRDX1 PE=1 SV=1                                         | 22.1 | 9.2  | 114.4 (M:114.4)   | 26.1 |
| PPIB_HUMAN  | Peptidyl-prolyl cis-trans isomerase B OS=Homo sapiens GN=PPIB PE=1 SV=2                    | 23.7 | 9.9  | 154.4 (M:154.4)   | 23.1 |
| PPIA_HUMAN  | Peptidyl-prolyl cis-trans isomerase A OS=Homo sapiens GN=PPIA PE=1 SV=2                    | 18.0 | 9.0  | 462.0 (M:462.0)   | 40.0 |
| PODXL_HUMAN | Podocalyxin OS=Homo sapiens GN=PODXL PE=1 SV=2                                             | 58.6 | 5.2  | 111.9 (M:111.9)   | 5.2  |
| PLSL_HUMAN  | Plastin-2 OS=Homo sapiens GN=LCPI PE=1 SV=6                                                | 70.2 | 5.2  | 49.3 (M:49.3)     | 4.0  |
| PLMN_HUMAN  | Plasminogen OS=Homo sapiens GN=PLG PE=1 SV=2                                               | 90.5 | 7.3  | 88.8 (M:88.8)     | 6.5  |
| PIP_HUMAN   | Prolactin-inducible protein OS=Homo sapiens GN=PIP PE=1 SV=1                               | 16.6 | 9.3  | 1028.2 (M:1028.2) | 44.5 |
| PIGR_HUMAN  | Polymeric immunoglobulin receptor OS=Homo sapiens GN=PIGR PE=1 SV=4                        | 83.2 | 5.5  | 1805.5 (M:1805.5) | 24.0 |
| PHP14_HUMAN | 14 kDa phosphohistidine phosphatase OS=Homo sapiens GN=PHPT1 PE=1 SV=1                     | 13.8 | 5.6  | 116.4 (M:116.4)   | 25.6 |
| PGS1_HUMAN  | Biglycan OS=Homo sapiens GN=BGN PE=1 SV=2                                                  | 41.6 | 7.9  | 441.2 (M:441.2)   | 22.6 |
| PGRP1_HUMAN | Peptidoglycan recognition protein 1 OS=Homo sapiens GN=PGLYRP1 PE=1 SV=1                   | 21.7 | 10.0 | 159.3 (M:159.3)   | 7.7  |
| PGK1_HUMAN  | Phosphoglycerate kinase 1 OS=Homo sapiens GN=PGK1 PE=1 SV=3                                | 44.6 | 9.2  | 309.3 (M:309.3)   | 17.3 |

|             |                                                                                                         |       |      |                    |      |
|-------------|---------------------------------------------------------------------------------------------------------|-------|------|--------------------|------|
| PGBM_HUMAN  | Basement membrane-specific heparan sulfate proteoglycan core protein OS=Homo sapiens GN=HSPG2 PE=1 SV=4 | 468.5 | 6.1  | 200.9<br>(M:200.9) | 1.0  |
| PGAM1_HUMAN | Phosphoglycerate mutase 1 OS=Homo sapiens GN=PGAM1 PE=1 SV=2                                            | 28.8  | 6.8  | 139.4<br>(M:139.4) | 13.8 |
| PERM_HUMAN  | Myeloperoxidase OS=Homo sapiens GN=MPO PE=1 SV=1                                                        | 83.8  | 10.1 | 46.2 (M:46.2)      | 2.7  |
| PEPC_HUMAN  | Gastricsin OS=Homo sapiens GN=PGC PE=1 SV=1                                                             | 42.4  | 4.2  | 123.0<br>(M:123.0) | 4.4  |
| PEDF_HUMAN  | Pigment epithelium-derived factor OS=Homo sapiens GN=SERPINF1 PE=1 SV=4                                 | 46.3  | 6.0  | 285.1<br>(M:285.1) | 8.4  |
| PEBP1_HUMAN | Phosphatidylethanolamine-binding protein 1 OS=Homo sapiens GN=PEBP1 PE=1 SV=3                           | 21.0  | 7.8  | 111.8<br>(M:111.8) | 9.6  |
| PDZ1P_HUMAN | Putative PDZ domain-containing protein 1P OS=Homo sapiens GN=PDZK1P1 PE=5 SV=2                          | 44.0  | 5.3  | 76.7 (M:76.7)      | 8.2  |
| PDIA3_HUMAN | Protein disulfide-isomerase A3 OS=Homo sapiens GN=PDIA3 PE=1 SV=4                                       | 56.7  | 5.9  | 39.7 (M:39.7)      | 2.2  |
| PDCD6_HUMAN | Programmed cell death protein 6 OS=Homo sapiens GN=PDCD6 PE=1 SV=1                                      | 21.9  | 5.0  | 180.6<br>(M:180.6) | 31.9 |
| PDC6I_HUMAN | Programmed cell death 6-interacting protein OS=Homo sapiens GN=PDCD6IP PE=1 SV=1                        | 96.0  | 6.1  | 511.2<br>(M:511.2) | 15.4 |
| PCP_HUMAN   | Lysosomal Pro-X carboxypeptidase OS=Homo sapiens GN=PRCP PE=1 SV=1                                      | 55.8  | 6.9  | 108.9<br>(M:108.9) | 2.4  |
| OSTP_HUMAN  | Osteopontin OS=Homo sapiens GN=SPP1 PE=1 SV=1                                                           | 35.4  | 4.2  | 244.6<br>(M:244.6) | 15.0 |
| OR5C1_HUMAN | Olfactory receptor 5C1 OS=Homo sapiens GN=OR5C1 PE=2 SV=1                                               | 35.0  | 9.9  | 31.8 (M:31.8)      | 2.2  |
| NID1_HUMAN  | Nidogen-1 OS=Homo sapiens GN=NID1 PE=1 SV=3                                                             | 136.3 | 5.0  | 581.6<br>(M:581.6) | 3.4  |
| NHRF1_HUMAN | Na(+)/H(+) exchange regulatory cofactor NHE-RF1 OS=Homo sapiens GN=SLC9A3R1 PE=1 SV=4                   | 38.8  | 5.5  | 323.7<br>(M:323.7) | 33.0 |
| NEP_HUMAN   | Neprilysin OS=Homo sapiens GN=MME PE=1 SV=2                                                             | 85.5  | 5.4  | 641.8<br>(M:641.8) | 14.4 |
| NAPSA_HUMAN | Napsin-A OS=Homo sapiens GN=NAPSA PE=1 SV=1                                                             | 45.4  | 6.2  | 565.9<br>(M:565.9) | 10.0 |
| MYL6_HUMAN  | Myosin light polypeptide 6 OS=Homo sapiens GN=MYL6 PE=1 SV=2                                            | 16.9  | 4.4  | 172.7<br>(M:172.7) | 26.5 |
| MYH9_HUMAN  | Myosin-9 OS=Homo sapiens GN=MYH9 PE=1 SV=4                                                              | 226.4 | 5.4  | 133.1<br>(M:133.1) | 2.4  |
| MYG_HUMAN   | Myoglobin OS=Homo sapiens GN=MB PE=1 SV=2                                                               | 17.2  | 7.9  | 33.5 (M:33.5)      | 9.7  |
| MXRA8_HUMAN | Matrix-remodeling-associated protein 8 OS=Homo sapiens GN=MXRA8 PE=2 SV=1                               | 49.1  | 6.8  | 259.6<br>(M:259.6) | 13.6 |
| MUC6_HUMAN  | Mucin-6 OS=Homo sapiens GN=MUC6 PE=1 SV=3                                                               | 256.9 | 7.5  | 129.1<br>(M:129.1) | 1.4  |
| MUC1_HUMAN  | Mucin-1 OS=Homo sapiens GN=MUC1 PE=1 SV=3                                                               | 122.0 | 7.0  | 405.6<br>(M:405.6) | 5.9  |
| MORC1_HUMAN | MORC family CW-type zinc finger protein 1 OS=Homo                                                       | 112.8 | 9.0  | 33.8 (M:33.8)      | 0.8  |

|             |                                                           |       |      |                      |      |
|-------------|-----------------------------------------------------------|-------|------|----------------------|------|
| N           | sapiens GN=MORC1 PE=2 SV=2                                |       |      |                      |      |
| MOES_HUMAN  | Moesin OS=Homo sapiens GN=MSN PE=1 SV=3                   | 67.8  | 6.0  | 1409.9<br>(M:1409.9) | 34.3 |
| MMP7_HUMAN  | Matrilysin OS=Homo sapiens GN=MMP7 PE=1 SV=1              | 29.7  | 8.8  | 63.4 (M:63.4)        | 9.4  |
| MMP20_HUMA  | Matrix metalloproteinase-20 OS=Homo sapiens GN=MMP20      | 54.4  | 9.4  | 27.8 (M:27.8)        | 1.9  |
| N           | PE=1 SV=3                                                 |       |      |                      |      |
| MIF_HUMAN   | Macrophage migration inhibitory factor OS=Homo sapiens    | 12.5  | 9.1  | 115.7<br>(M:115.7)   | 17.4 |
|             | GN=MIF PE=1 SV=4                                          |       |      |                      |      |
| MGA_HUMAN   | Maltase-glucoamylase, intestinal OS=Homo sapiens          | 209.7 | 5.2  | 111.1<br>(M:111.1)   | 2.2  |
|             | GN=MGAM PE=1 SV=5                                         |       |      |                      |      |
| MDHM_HUMA   | Malate dehydrogenase, mitochondrial OS=Homo sapiens       | 35.5  | 9.8  | 56.0 (M:56.0)        | 7.7  |
| N           | GN=MDH2 PE=1 SV=3                                         |       |      |                      |      |
| MDHC_HUMA   | Malate dehydrogenase, cytoplasmic OS=Homo sapiens         | 36.4  | 7.7  | 32.8 (M:32.8)        | 2.4  |
| N           | GN=MDH1 PE=1 SV=4                                         |       |      |                      |      |
| MCCB_HUMAN  | Methylcrotonoyl-CoA carboxylase beta chain, mitochondrial | 61.3  | 8.5  | 26.0 (M:26.0)        | 1.6  |
|             | OS=Homo sapiens GN=MCCC2 PE=1 SV=1                        |       |      |                      |      |
| MASP2_HUMA  | Mannan-binding lectin serine protease 2 OS=Homo sapiens   | 75.7  | 5.3  | 1872.2<br>(M:1872.2) | 10.1 |
| N           | GN=MASP2 PE=1 SV=4                                        |       |      |                      |      |
| MAL2_HUMAN  | Protein MAL2 OS=Homo sapiens GN=MAL2 PE=1 SV=1            | 19.1  | 5.8  | 35.4 (M:35.4)        | 6.2  |
| MA1A1_HUMA  | Mannosyl-oligosaccharide 1,2-alpha-mannosidase IA         | 72.9  | 6.0  | 187.0<br>(M:187.0)   | 12.1 |
| N           | OS=Homo sapiens GN=MAN1A1 PE=1 SV=3                       |       |      |                      |      |
| LYSC_HUMAN  | Lysozyme C OS=Homo sapiens GN=LYZ PE=1 SV=1               | 16.5  | 10.6 | 157.8<br>(M:157.8)   | 16.2 |
| LMAN2_HUMA  | Vesicular integral-membrane protein VIP36 OS=Homo sapiens | 40.2  | 6.5  | 960.4<br>(M:960.4)   | 46.3 |
| N           | GN=LMAN2 PE=1 SV=1                                        |       |      |                      |      |
| LG3BP_HUMA  | Galectin-3-binding protein OS=Homo sapiens GN=LGALS3BP    | 65.3  | 5.0  | 362.9<br>(M:362.9)   | 14.4 |
| N           | PE=1 SV=1                                                 |       |      |                      |      |
| LEG3_HUMAN  | Galectin-3 OS=Homo sapiens GN=LGALS3 PE=1 SV=5            | 26.1  | 9.1  | 90.6 (M:90.6)        | 8.4  |
| LDHB_HUMAN  | L-lactate dehydrogenase B chain OS=Homo sapiens           | 36.6  | 5.7  | 356.2<br>(M:356.2)   | 21.9 |
|             | GN=LDHB PE=1 SV=2                                         |       |      |                      |      |
| LBP_HUMAN   | Lipopolysaccharide-binding protein OS=Homo sapiens        | 53.3  | 6.2  | 89.5 (M:89.5)        | 5.6  |
|             | GN=LBP PE=1 SV=3                                          |       |      |                      |      |
| LAMP1_HUMA  | Lysosome-associated membrane glycoprotein 1 OS=Homo       | 44.9  | 9.9  | 69.6 (M:69.6)        | 2.6  |
| N           | sapiens GN=LAMP1 PE=1 SV=3                                |       |      |                      |      |
| LAC2_HUMAN  | Ig lambda-2 chain C regions OS=Homo sapiens GN=IGLC2      | 11.3  | 7.7  | 1415.9<br>(M:1415.9) | 74.5 |
|             | PE=1 SV=1                                                 |       |      |                      |      |
| KV402_HUMA  | Ig kappa chain V-IV region Len OS=Homo sapiens PE=1 SV=2  | 12.6  | 9.0  | 267.3<br>(M:267.3)   | 15.8 |
| N           |                                                           |       |      |                      |      |
| KV309_HUMA  | Ig kappa chain V-III region VG (Fragment) OS=Homo sapiens | 12.6  | 4.7  | 37.2 (M:37.2)        | 7.8  |
| N           | PE=1 SV=1                                                 |       |      |                      |      |
| KV302_HUMA  | Ig kappa chain V-III region SIE OS=Homo sapiens PE=1 SV=1 | 11.8  | 9.5  | 345.3<br>(M:345.3)   | 39.4 |
| N           |                                                           |       |      |                      |      |
| KV204_HUMA  | Ig kappa chain V-II region TEW OS=Homo sapiens PE=1       | 12.3  | 5.6  | 127.3<br>(M:127.3)   | 32.7 |
| N           | SV=1                                                      |       |      |                      |      |
| KV113_HUMAN | Ig kappa chain V-I region Lay OS=Homo sapiens PE=1 SV=1   | 11.8  | 9.2  | 64.3 (M:64.3)        | 8.3  |

|                 |                                                                                    |       |      |                      |      |
|-----------------|------------------------------------------------------------------------------------|-------|------|----------------------|------|
| KV106_HUMA<br>N | Ig kappa chain V-I region EU OS=Homo sapiens PE=1 SV=1                             | 11.8  | 9.2  | 149.7<br>(M:149.7)   | 26.9 |
| KV101_HUMA<br>N | Ig kappa chain V-I region AG OS=Homo sapiens PE=1 SV=1                             | 12.0  | 5.6  | 114.0<br>(M:114.0)   | 16.7 |
| KPYM_HUMAN      | Pyruvate kinase isozymes M1/M2 OS=Homo sapiens<br>GN=PKM PE=1 SV=4                 | 57.9  | 9.0  | 62.5 (M:62.5)        | 5.8  |
| KNG1_HUMAN      | Kininogen-1 OS=Homo sapiens GN=KNG1 PE=1 SV=2                                      | 71.9  | 6.4  | 153.2<br>(M:153.2)   | 9.0  |
| KCRB_HUMAN      | Creatine kinase B-type OS=Homo sapiens GN=CKB PE=1<br>SV=1                         | 42.6  | 5.2  | 69.2 (M:69.2)        | 4.7  |
| K2C8_HUMAN      | Keratin, type II cytoskeletal 8 OS=Homo sapiens GN=KRT8<br>PE=1 SV=7               | 53.7  | 5.4  | 813.3<br>(M:813.3)   | 31.3 |
| K2C7_HUMAN      | Keratin, type II cytoskeletal 7 OS=Homo sapiens GN=KRT7<br>PE=1 SV=5               | 51.4  | 5.3  | 159.2<br>(M:159.2)   | 11.9 |
| K2C79_HUMAN     | Keratin, type II cytoskeletal 79 OS=Homo sapiens GN=KRT79<br>PE=1 SV=2             | 57.8  | 6.9  | 88.2 (M:88.2)        | 4.1  |
| K2C4_HUMAN      | Keratin, type II cytoskeletal 4 OS=Homo sapiens GN=KRT4<br>PE=1 SV=4               | 57.2  | 6.2  | 61.3 (M:61.3)        | 2.2  |
| K2C1_HUMAN      | Keratin, type II cytoskeletal 1 OS=Homo sapiens GN=KRT1<br>PE=1 SV=6               | 66.0  | 8.8  | 76.9 (M:76.9)        | 3.7  |
| K1C19_HUMAN     | Keratin, type I cytoskeletal 19 OS=Homo sapiens GN=KRT19<br>PE=1 SV=4              | 44.1  | 4.9  | 622.6<br>(M:622.6)   | 48.0 |
| K1C18_HUMAN     | Keratin, type I cytoskeletal 18 OS=Homo sapiens GN=KRT18<br>PE=1 SV=2              | 48.0  | 5.2  | 307.0<br>(M:307.0)   | 16.5 |
| K1C13_HUMAN     | Keratin, type I cytoskeletal 13 OS=Homo sapiens GN=KRT13<br>PE=1 SV=4              | 49.6  | 4.8  | 143.5<br>(M:143.5)   | 11.1 |
| K1C10_HUMAN     | Keratin, type I cytoskeletal 10 OS=Homo sapiens GN=KRT10<br>PE=1 SV=6              | 58.8  | 5.0  | 60.7 (M:60.7)        | 4.1  |
| ITIH4_HUMAN     | Inter-alpha-trypsin inhibitor heavy chain H4 OS=Homo sapiens<br>GN=ITIH4 PE=1 SV=4 | 103.3 | 6.5  | 149.0<br>(M:149.0)   | 5.6  |
| IST1_HUMAN      | IST1 homolog OS=Homo sapiens GN=IST1 PE=1 SV=1                                     | 39.7  | 5.1  | 608.2<br>(M:608.2)   | 19.5 |
| IPSP_HUMAN      | Plasma serine protease inhibitor OS=Homo sapiens<br>GN=SERPINA5 PE=1 SV=3          | 45.6  | 9.8  | 125.5<br>(M:125.5)   | 12.3 |
| IPLL5_HUMAN     | Immunoglobulin lambda-like polypeptide 5 OS=Homo sapiens<br>GN=IPLL5 PE=2 SV=2     | 23.0  | 10.0 | 1200.6<br>(M:1200.6) | 27.1 |
| IGKC_HUMAN      | Ig kappa chain C region OS=Homo sapiens GN=IGKC PE=1<br>SV=1                       | 11.6  | 5.5  | 3056.5<br>(M:3056.5) | 64.2 |
| IGJ_HUMAN       | Immunoglobulin J chain OS=Homo sapiens GN=IGJ PE=1<br>SV=4                         | 18.1  | 5.0  | 479.3<br>(M:479.3)   | 28.3 |
| IGHM_HUMAN      | Ig mu chain C region OS=Homo sapiens GN=IGHM PE=1<br>SV=3                          | 49.3  | 6.4  | 193.4<br>(M:193.4)   | 17.3 |
| IGHG4_HUMA<br>N | Ig gamma-4 chain C region OS=Homo sapiens GN=IGHG4<br>PE=1 SV=1                    | 35.9  | 7.8  | 890.5<br>(M:890.5)   | 22.6 |
| IGHG1_HUMA      | Ig gamma-1 chain C region OS=Homo sapiens GN=IGHG1                                 | 36.1  | 9.4  | 1283.8               | 45.2 |



|             |                                                                               |      |      |                   |            |  |
|-------------|-------------------------------------------------------------------------------|------|------|-------------------|------------|--|
| N           | PE=1 SV=1                                                                     |      |      |                   | (M:1283.8) |  |
| IGHA1_HUMA  | Ig alpha-1 chain C region OS=Homo sapiens GN=IGHA1                            | 37.6 | 6.1  | 4619.3            | 52.4       |  |
| N           | PE=1 SV=2                                                                     |      |      | (M:4619.3)        |            |  |
| IDHC_HUMAN  | Isocitrate dehydrogenase [NADP] cytoplasmic OS=Homo sapiens GN=IDH1 PE=1 SV=2 | 46.6 | 6.6  | 30.5 (M:30.5)     | 2.2        |  |
| IC1_HUMAN   | Plasma protease C1 inhibitor OS=Homo sapiens GN=SERPING1 PE=1 SV=2            | 55.1 | 6.1  | 277.0 (M:277.0)   | 10.8       |  |
| HSPB1_HUMA  | Heat shock protein beta-1 OS=Homo sapiens GN=HSPB1                            | 22.8 | 6.0  | 294.4 (M:294.4)   | 30.2       |  |
| N           | PE=1 SV=2                                                                     |      |      |                   |            |  |
| HSP7C_HUMA  | Heat shock cognate 71 kDa protein OS=Homo sapiens GN=HSPA8 PE=1 SV=1          | 70.9 | 5.2  | 357.6 (M:357.6)   | 16.7       |  |
| N           | PE=1 SV=2                                                                     |      |      |                   |            |  |
| HSP71_HUMAN | Heat shock 70 kDa protein 1A/1B OS=Homo sapiens GN=HSPA1A PE=1 SV=5           | 70.0 | 5.4  | 197.3 (M:197.3)   | 12.6       |  |
| HS90B_HUMA  | Heat shock protein HSP 90-beta OS=Homo sapiens GN=HSP90AB1 PE=1 SV=4          | 83.2 | 4.8  | 51.9 (M:51.9)     | 5.0        |  |
| N           | PE=1 SV=2                                                                     |      |      |                   |            |  |
| HS90A_HUMA  | Heat shock protein HSP 90-alpha OS=Homo sapiens GN=HSP90AA1 PE=1 SV=5         | 84.6 | 4.8  | 52.2 (M:52.2)     | 4.0        |  |
| N           | PE=1 SV=2                                                                     |      |      |                   |            |  |
| HPT_HUMAN   | Haptoglobin OS=Homo sapiens GN=HP PE=1 SV=1                                   | 45.2 | 6.1  | 71.3 (M:71.3)     | 9.9        |  |
| HEXB_HUMAN  | Beta-hexosaminidase subunit beta OS=Homo sapiens GN=HEXB PE=1 SV=3            | 63.1 | 6.3  | 33.8 (M:33.8)     | 2.0        |  |
| HEMO_HUMA   | Hemopexin OS=Homo sapiens GN=HPX PE=1 SV=2                                    | 51.6 | 6.6  | 91.6 (M:91.6)     | 4.3        |  |
| N           | PE=1 SV=2                                                                     |      |      |                   |            |  |
| HBD_HUMAN   | Hemoglobin subunit delta OS=Homo sapiens GN=HBD PE=1 SV=2                     | 16.0 | 9.1  | 1433.7 (M:1433.7) | 42.9       |  |
| HBB_HUMAN   | Hemoglobin subunit beta OS=Homo sapiens GN=HBB PE=1 SV=2                      | 16.0 | 6.9  | 2203.7 (M:2203.7) | 89.8       |  |
| HBA_HUMAN   | Hemoglobin subunit alpha OS=Homo sapiens GN=HBA1 PE=1 SV=2                    | 15.2 | 9.4  | 1254.4 (M:1254.4) | 48.6       |  |
| H4_HUMAN    | Histone H4 OS=Homo sapiens GN=HIST1H4A PE=1 SV=2                              | 11.4 | 11.8 | 426.7 (M:426.7)   | 35.0       |  |
| H33_HUMAN   | Histone H3.3 OS=Homo sapiens GN=H3F3A PE=1 SV=2                               | 15.3 | 11.9 | 402.7 (M:402.7)   | 30.1       |  |
| H2B1C_HUMA  | Histone H2B type 1-C/E/F/G/I OS=Homo sapiens GN=HIST1H2BC PE=1 SV=4           | 13.9 | 10.8 | 694.5 (M:694.5)   | 32.5       |  |
| N           | PE=1 SV=2                                                                     |      |      |                   |            |  |
| H2B1B_HUMA  | Histone H2B type 1-B OS=Homo sapiens GN=HIST1H2BB PE=1 SV=2                   | 13.9 | 10.8 | 703.8 (M:703.8)   | 32.5       |  |
| N           | PE=1 SV=2                                                                     |      |      |                   |            |  |
| H2AW_HUMAN  | Core histone macro-H2A.2 OS=Homo sapiens GN=H2AFY2 PE=1 SV=3                  | 40.0 | 10.3 | 77.1 (M:77.1)     | 2.4        |  |
| H2AV_HUMAN  | Histone H2A.V OS=Homo sapiens GN=H2AFV PE=1 SV=3                              | 13.5 | 11.0 | 154.2 (M:154.2)   | 23.4       |  |
| H2A1D_HUMA  | Histone H2A type 1-D OS=Homo sapiens GN=HIST1H2AD PE=1 SV=2                   | 14.1 | 11.4 | 906.3 (M:906.3)   | 35.4       |  |
| N           | PE=1 SV=2                                                                     |      |      |                   |            |  |
| H2A1B_HUMA  | Histone H2A type 1-B/E OS=Homo sapiens GN=HIST1H2AB PE=1 SV=2                 | 14.1 | 11.5 | 888.0 (M:888.0)   | 35.4       |  |
| N           | PE=1 SV=2                                                                     |      |      |                   |            |  |
| H2A1A_HUMA  | Histone H2A type 1-A OS=Homo sapiens GN=HIST1H2AA                             | 14.2 | 11.3 | 234.6             | 29.8       |  |

|            |                                                           |       |      |               |           |            |
|------------|-----------------------------------------------------------|-------|------|---------------|-----------|------------|
| N          | PE=1 SV=3                                                 |       |      |               | (M:234.6) |            |
| H12_HUMAN  | Histone H1.2 OS=Homo sapiens GN=HIST1H1C PE=1 SV=2        | 21.4  | 11.4 | 215.2         | 17.8      | (M:215.2)  |
| GSTP1_HUMA | Glutathione S-transferase P OS=Homo sapiens GN=GSTP1      | 23.3  | 5.3  | 189.3         | 19.5      | (M:189.3)  |
| N          | PE=1 SV=2                                                 |       |      |               |           |            |
| GSTA2_HUMA | Glutathione S-transferase A2 OS=Homo sapiens GN=GSTA2     | 25.6  | 9.1  | 89.5 (M:89.5) | 11.7      |            |
| N          | PE=1 SV=4                                                 |       |      |               |           |            |
| GRAN_HUMAN | Grancalcin OS=Homo sapiens GN=GCA PE=1 SV=2               | 24.0  | 4.9  | 43.1 (M:43.1) | 4.1       |            |
| GPC5C_HUMA | G-protein coupled receptor family C group 5 member C      | 48.2  | 9.6  | 440.0         | 23.4      | (M:440.0)  |
| N          | OS=Homo sapiens GN=GPRC5C PE=1 SV=2                       |       |      |               |           |            |
| GPC5B_HUMA | G-protein coupled receptor family C group 5 member B      | 44.8  | 9.6  | 220.0         | 8.7       | (M:220.0)  |
| N          | OS=Homo sapiens GN=GPRC5B PE=2 SV=2                       |       |      |               |           |            |
| GPC4_HUMAN | Glypican-4 OS=Homo sapiens GN=GPC4 PE=1 SV=4              | 62.4  | 6.3  | 62.7 (M:62.7) | 3.1       |            |
| GPC3_HUMAN | Glypican-3 OS=Homo sapiens GN=GPC3 PE=1 SV=1              | 65.5  | 5.9  | 147.4         | 7.8       | (M:147.4)  |
| GPC1_HUMAN | Glypican-1 OS=Homo sapiens GN=GPC1 PE=1 SV=2              | 61.6  | 7.8  | 45.2 (M:45.2) | 5.4       |            |
| GNAL_HUMAN | Guanine nucleotide-binding protein G(olf) subunit alpha   | 44.3  | 6.2  | 67.4 (M:67.4) | 2.9       |            |
|            | OS=Homo sapiens GN=GNAL PE=1 SV=1                         |       |      |               |           |            |
| GILT_HUMAN | Gamma-interferon-inducible lysosomal thiol reductase      | 27.9  | 4.6  | 29.3 (M:29.3) | 4.4       |            |
|            | OS=Homo sapiens GN=IFI30 PE=1 SV=3                        |       |      |               |           |            |
| GGT1_HUMAN | Gamma-glutamyltranspeptidase 1 OS=Homo sapiens            | 61.4  | 6.7  | 314.0         | 10.0      | (M:314.0)  |
|            | GN=GGT1 PE=1 SV=2                                         |       |      |               |           |            |
| GELS_HUMAN | Gelsolin OS=Homo sapiens GN=GSN PE=1 SV=1                 | 85.6  | 5.9  | 605.1         | 11.4      | (M:605.1)  |
| GDPD3_HUMA | Glycerophosphodiester phosphodiesterase domain-containing | 36.6  | 9.2  | 90.0 (M:90.0) | 4.4       |            |
| N          | protein 3 OS=Homo sapiens GN=GDPD3 PE=2 SV=3              |       |      |               |           |            |
| GDIA_HUMAN | Rab GDP dissociation inhibitor alpha OS=Homo sapiens      | 50.6  | 4.9  | 124.2         | 4.3       | (M:124.2)  |
|            | GN=GDI1 PE=1 SV=2                                         |       |      |               |           |            |
| GBG12_HUMA | Guanine nucleotide-binding protein G(I)/G(S)/G(O) subunit | 8.0   | 10.1 | 53.4 (M:53.4) | 22.2      |            |
| N          | gamma-12 OS=Homo sapiens GN=GNG12 PE=1 SV=3               |       |      |               |           |            |
| G6PI_HUMAN | Glucose-6-phosphate isomerase OS=Homo sapiens GN=GPI      | 63.1  | 9.1  | 143.0         | 5.7       | (M:143.0)  |
|            | PE=1 SV=4                                                 |       |      |               |           |            |
| G3P_HUMAN  | Glyceraldehyde-3-phosphate dehydrogenase OS=Homo sapiens  | 36.0  | 9.3  | 1189.8        | 41.2      | (M:1189.8) |
|            | GN=GAPDH PE=1 SV=3                                        |       |      |               |           |            |
| FINC_HUMAN | Fibronectin OS=Homo sapiens GN=FN1 PE=1 SV=4              | 262.5 | 5.4  | 4823.4        | 26.7      | (M:4823.4) |
| FIBG_HUMAN | Fibrinogen gamma chain OS=Homo sapiens GN=FGG PE=1        | 51.5  | 5.3  | 2452.2        | 54.1      | (M:2452.2) |
|            | SV=3                                                      |       |      |               |           |            |
| FIBB_HUMAN | Fibrinogen beta chain OS=Homo sapiens GN=FGB PE=1         | 55.9  | 9.3  | 3939.1        | 57.0      | (M:3939.1) |
|            | SV=2                                                      |       |      |               |           |            |
| FIBA_HUMAN | Fibrinogen alpha chain OS=Homo sapiens GN=FGA PE=1        | 94.9  | 5.6  | 3520.0        | 39.7      | (M:3520.0) |
|            | SV=2                                                      |       |      |               |           |            |
| FGL2_HUMAN | Fibroleukin OS=Homo sapiens GN=FGL2 PE=1 SV=1             | 50.2  | 7.7  | 156.8         | 5.7       | (M:156.8)  |
| FETUA_HUMA | Alpha-2-HS-glycoprotein OS=Homo sapiens GN=AHSG PE=1      | 39.3  | 5.4  | 502.3         | 19.9      |            |

|             |                                                                  |       |      |               |           |  |
|-------------|------------------------------------------------------------------|-------|------|---------------|-----------|--|
| N           | SV=1                                                             |       |      |               | (M:502.3) |  |
| FCN2_HUMAN  | Ficolin-2 OS=Homo sapiens GN=FCN2 PE=1 SV=2                      | 34.0  | 6.4  | 58.5 (M:58.5) | 4.2       |  |
| FBLN5_HUMA  | Fibulin-5 OS=Homo sapiens GN=FBLN5 PE=1 SV=1                     | 50.1  | 4.4  | 29.9 (M:29.9) | 2.0       |  |
| N           |                                                                  |       |      |               |           |  |
| FBLN3_HUMA  | EGF-containing fibulin-like extracellular matrix protein 1       | 54.6  | 4.8  | 160.8         | 12.6      |  |
| N           | OS=Homo sapiens GN=EFEMP1 PE=1 SV=2                              |       |      | (M:160.8)     |           |  |
| FABPH_HUMA  | Fatty acid-binding protein, heart OS=Homo sapiens                | 14.8  | 6.4  | 41.7 (M:41.7) | 6.8       |  |
| N           | GN=FABP3 PE=1 SV=4                                               |       |      |               |           |  |
| F16P1_HUMAN | Fructose-1,6-bisphosphatase 1 OS=Homo sapiens GN=FBP1            | 36.8  | 6.7  | 182.9         | 9.8       |  |
|             | PE=1 SV=5                                                        |       |      | (M:182.9)     |           |  |
| EZRI_HUMAN  | Ezrin OS=Homo sapiens GN=EZR PE=1 SV=4                           | 69.4  | 5.9  | 1750.2        | 37.0      |  |
|             |                                                                  |       |      | (M:1750.2)    |           |  |
| ESPB1_HUMAN | Epididymal sperm-binding protein 1 OS=Homo sapiens               | 26.1  | 6.2  | 34.6 (M:34.6) | 3.6       |  |
|             | GN=ELSPBP1 PE=1 SV=2                                             |       |      |               |           |  |
| ES8L2_HUMAN | Epidermal growth factor receptor kinase substrate 8-like protein | 80.6  | 6.4  | 138.8         | 8.3       |  |
|             | 2 OS=Homo sapiens GN=EPS8L2 PE=1 SV=2                            |       |      | (M:138.8)     |           |  |
| ENPL_HUMAN  | Endoplasmin OS=Homo sapiens GN=HSP90B1 PE=1 SV=1                 | 92.4  | 4.6  | 71.5 (M:71.5) | 1.2       |  |
| ENOA_HUMAN  | Alpha-enolase OS=Homo sapiens GN=ENO1 PE=1 SV=2                  | 47.1  | 7.7  | 1047.2        | 35.3      |  |
|             |                                                                  |       |      | (M:1047.2)    |           |  |
| ELNE_HUMAN  | Neutrophil elastase OS=Homo sapiens GN=ELANE PE=1                | 28.5  | 12.2 | 68.0 (M:68.0) | 6.4       |  |
|             | SV=1                                                             |       |      |               |           |  |
| EHD4_HUMAN  | EH domain-containing protein 4 OS=Homo sapiens GN=EHD4           | 61.1  | 6.3  | 300.2         | 13.7      |  |
|             | PE=1 SV=1                                                        |       |      | (M:300.2)     |           |  |
| EHD1_HUMAN  | EH domain-containing protein 1 OS=Homo sapiens GN=EHD1           | 60.6  | 6.4  | 83.0 (M:83.0) | 12.0      |  |
|             | PE=1 SV=2                                                        |       |      |               |           |  |
| EGF_HUMAN   | Pro-epidermal growth factor OS=Homo sapiens GN=EGF               | 133.9 | 5.5  | 117.7         | 2.6       |  |
|             | PE=1 SV=2                                                        |       |      | (M:117.7)     |           |  |
| EF2_HUMAN   | Elongation factor 2 OS=Homo sapiens GN=EEF2 PE=1 SV=4            | 95.3  | 6.4  | 61.8 (M:61.8) | 1.5       |  |
| EF1A1_HUMAN | Elongation factor 1-alpha 1 OS=Homo sapiens GN=EEF1A1            | 50.1  | 9.7  | 197.8         | 9.7       |  |
|             | PE=1 SV=1                                                        |       |      | (M:197.8)     |           |  |
| ECM1_HUMAN  | Extracellular matrix protein 1 OS=Homo sapiens GN=ECM1           | 60.6  | 6.3  | 117.4         | 8.7       |  |
|             | PE=1 SV=2                                                        |       |      | (M:117.4)     |           |  |
| ECHM_HUMAN  | Enoyl-CoA hydratase, mitochondrial OS=Homo sapiens               | 31.4  | 9.4  | 77.3 (M:77.3) | 5.9       |  |
|             | GN=ECHS1 PE=1 SV=4                                               |       |      |               |           |  |
| ECHB_HUMAN  | Trifunctional enzyme subunit beta, mitochondrial OS=Homo         | 51.3  | 10.0 | 83.1 (M:83.1) | 1.9       |  |
|             | sapiens GN=HADHB PE=1 SV=3                                       |       |      |               |           |  |
| DPP4_HUMAN  | Dipeptidyl peptidase 4 OS=Homo sapiens GN=DPP4 PE=1              | 88.2  | 5.6  | 43.7 (M:43.7) | 1.3       |  |
|             | SV=2                                                             |       |      |               |           |  |
| DPEP1_HUMA  | Dipeptidase 1 OS=Homo sapiens GN=DPEP1 PE=1 SV=3                 | 45.6  | 5.7  | 350.2         | 13.4      |  |
| N           |                                                                  |       |      | (M:350.2)     |           |  |
| DEFB1_HUMA  | Beta-defensin 1 OS=Homo sapiens GN=DEFB1 PE=1 SV=1               | 7.4   | 10.3 | 69.5 (M:69.5) | 33.8      |  |
| N           |                                                                  |       |      |               |           |  |
| DEF1_HUMAN  | Neutrophil defensin 1 OS=Homo sapiens GN=DEFA1 PE=1              | 10.2  | 7.6  | 86.6 (M:86.6) | 20.2      |  |
|             | SV=1                                                             |       |      |               |           |  |
| DDC_HUMAN   | Aromatic-L-amino-acid decarboxylase OS=Homo sapiens              | 53.9  | 6.9  | 34.0 (M:34.0) | 1.7       |  |

GN=DDC PE=1 SV=2

|             |                                                                                   |       |      |                      |      |
|-------------|-----------------------------------------------------------------------------------|-------|------|----------------------|------|
| CYTC_HUMAN  | Cystatin-C OS=Homo sapiens GN=CST3 PE=1 SV=1                                      | 15.8  | 9.9  | 135.4<br>(M:135.4)   | 30.8 |
| CYTB_HUMAN  | Cystatin-B OS=Homo sapiens GN=CSTB PE=1 SV=2                                      | 11.1  | 7.9  | 62.0 (M:62.0)        | 12.2 |
| CUBN_HUMAN  | Cubilin OS=Homo sapiens GN=CUBN PE=1 SV=5                                         | 398.5 | 5.0  | 534.4<br>(M:534.4)   | 4.7  |
| CRYAB_HUMAN | Alpha-crystallin B chain OS=Homo sapiens GN=CRYAB PE=1 SV=2                       | 20.1  | 6.9  | 209.1<br>(M:209.1)   | 24.6 |
| CRIS1_HUMAN | Cysteine-rich secretory protein 1 OS=Homo sapiens GN=CRISP1 PE=1 SV=1             | 28.5  | 5.5  | 453.8<br>(M:453.8)   | 23.7 |
| CRAC1_HUMAN | Cartilage acidic protein 1 OS=Homo sapiens GN=CRTAC1 PE=1 SV=2                    | 71.4  | 4.8  | 61.6 (M:61.6)        | 2.9  |
| CPVL_HUMAN  | Probable serine carboxypeptidase CPVL OS=Homo sapiens GN=CPVL PE=1 SV=2           | 54.1  | 5.3  | 133.0<br>(M:133.0)   | 6.7  |
| CPNE3_HUMAN | Copine-3 OS=Homo sapiens GN=CPNE3 PE=1 SV=1                                       | 60.1  | 5.5  | 144.7<br>(M:144.7)   | 7.6  |
| COX5B_HUMAN | Cytochrome c oxidase subunit 5B, mitochondrial OS=Homo sapiens GN=COX5B PE=1 SV=2 | 13.7  | 10.2 | 53.9 (M:53.9)        | 9.3  |
| COX5A_HUMAN | Cytochrome c oxidase subunit 5A, mitochondrial OS=Homo sapiens GN=COX5A PE=1 SV=2 | 16.8  | 6.4  | 56.3 (M:56.3)        | 6.0  |
| COIA1_HUMAN | Collagen alpha-1(XVIII) chain OS=Homo sapiens GN=COL18A1 PE=1 SV=5                | 178.1 | 5.6  | 210.5<br>(M:210.5)   | 3.9  |
| COF1_HUMAN  | Cofilin-1 OS=Homo sapiens GN=CFL1 PE=1 SV=3                                       | 18.5  | 9.1  | 112.9<br>(M:112.9)   | 18.7 |
| CO9_HUMAN   | Complement component C9 OS=Homo sapiens GN=C9 PE=1 SV=2                           | 63.1  | 5.3  | 408.8<br>(M:408.8)   | 23.4 |
| CO4B_HUMAN  | Complement C4-B OS=Homo sapiens GN=C4B PE=1 SV=2                                  | 192.6 | 7.0  | 1589.2<br>(M:1589.2) | 19.4 |
| CO4A_HUMAN  | Complement C4-A OS=Homo sapiens GN=C4A PE=1 SV=2                                  | 192.7 | 6.7  | 1560.9<br>(M:1560.9) | 18.5 |
| CO3_HUMAN   | Complement C3 OS=Homo sapiens GN=C3 PE=1 SV=2                                     | 187.0 | 6.0  | 185.5<br>(M:185.5)   | 3.2  |
| CNDP2_HUMAN | Cytosolic non-specific dipeptidase OS=Homo sapiens GN=CNDP2 PE=1 SV=2             | 52.8  | 5.6  | 153.9<br>(M:153.9)   | 15.8 |
| CN37_HUMAN  | 2',3'-cyclic-nucleotide 3'-phosphodiesterase OS=Homo sapiens GN=CNP PE=1 SV=2     | 47.5  | 9.8  | 203.9<br>(M:203.9)   | 7.6  |
| CLUS_HUMAN  | Clusterin OS=Homo sapiens GN=CLU PE=1 SV=1                                        | 52.5  | 5.9  | 2396.7<br>(M:2396.7) | 34.3 |
| CLIC4_HUMAN | Chloride intracellular channel protein 4 OS=Homo sapiens GN=CLIC4 PE=1 SV=4       | 28.8  | 5.3  | 130.9<br>(M:130.9)   | 8.7  |
| CLIC1_HUMAN | Chloride intracellular channel protein 1 OS=Homo sapiens GN=CLIC1 PE=1 SV=4       | 26.9  | 4.9  | 131.7<br>(M:131.7)   | 12.4 |
| CHMP5_HUMAN | Charged multivesicular body protein 5 OS=Homo sapiens GN=CHMP5 PE=1 SV=1          | 24.6  | 4.5  | 206.9<br>(M:206.9)   | 15.5 |
| CHM4B_HUMAN | Charged multivesicular body protein 4b OS=Homo sapiens                            | 24.9  | 4.6  | 84.5 (M:84.5)        | 10.7 |

|            |                                                                      |       |      |               |      |
|------------|----------------------------------------------------------------------|-------|------|---------------|------|
| N          | GN=CHMP4B PE=1 SV=1                                                  |       |      |               |      |
| CHM2A_HUMA | Charged multivesicular body protein 2a OS=Homo sapiens               | 25.1  | 5.7  | 57.7 (M:57.7) | 7.2  |
| N          | GN=CHMP2A PE=1 SV=1                                                  |       |      |               |      |
| CHM1B_HUMA | Charged multivesicular body protein 1b OS=Homo sapiens               | 22.1  | 9.0  | 88.0 (M:88.0) | 5.0  |
| N          | GN=CHMP1B PE=1 SV=1                                                  |       |      |               |      |
| CH60_HUMAN | 60 kDa heat shock protein, mitochondrial OS=Homo sapiens             | 61.0  | 5.6  | 176.4         | 5.8  |
|            | GN=HSPD1 PE=1 SV=2                                                   |       |      | (M:176.4)     |      |
| CFAB_HUMAN | Complement factor B OS=Homo sapiens GN=CFB PE=1 SV=2                 | 85.5  | 6.7  | 278.0         | 13.5 |
|            |                                                                      |       |      | (M:278.0)     |      |
| CETP_HUMAN | Cholesteryl ester transfer protein OS=Homo sapiens GN=CETP PE=1 SV=2 | 54.7  | 5.7  | 72.7 (M:72.7) | 3.0  |
| CERU_HUMAN | Ceruloplasmin OS=Homo sapiens GN=CP PE=1 SV=1                        | 122.1 | 5.4  | 168.7         | 3.9  |
|            |                                                                      |       |      | (M:168.7)     |      |
| CDC42_HUMA | Cell division control protein 42 homolog OS=Homo sapiens             | 21.2  | 6.2  | 222.3         | 19.9 |
| N          | GN=CDC42 PE=1 SV=2                                                   |       |      | (M:222.3)     |      |
| CD9_HUMAN  | CD9 antigen OS=Homo sapiens GN=CD9 PE=1 SV=4                         | 25.4  | 7.7  | 262.7         | 15.4 |
|            |                                                                      |       |      | (M:262.7)     |      |
| CD59_HUMAN | CD59 glycoprotein OS=Homo sapiens GN=CD59 PE=1 SV=1                  | 14.2  | 6.1  | 121.1         | 19.5 |
|            |                                                                      |       |      | (M:121.1)     |      |
| CD14_HUMAN | Monocyte differentiation antigen CD14 OS=Homo sapiens                | 40.1  | 5.8  | 735.6         | 26.4 |
|            | GN=CD14 PE=1 SV=2                                                    |       |      | (M:735.6)     |      |
| CBR1_HUMAN | Carbonyl reductase [NADPH] 1 OS=Homo sapiens GN=CBR1 PE=1 SV=3       | 30.4  | 9.5  | 75.3 (M:75.3) | 4.0  |
| CBPZ_HUMAN | Carboxypeptidase Z OS=Homo sapiens GN=CPZ PE=1 SV=2                  | 73.6  | 9.2  | 48.6 (M:48.6) | 1.5  |
| CATZ_HUMAN | Cathepsin Z OS=Homo sapiens GN=CTSZ PE=1 SV=1                        | 33.8  | 6.9  | 97.0 (M:97.0) | 7.3  |
| CATG_HUMAN | Cathepsin G OS=Homo sapiens GN=CTSG PE=1 SV=2                        | 28.8  | 12.1 | 121.6         | 10.6 |
|            |                                                                      |       |      | (M:121.6)     |      |
| CATD_HUMAN | Cathepsin D OS=Homo sapiens GN=CTSD PE=1 SV=1                        | 44.5  | 6.1  | 415.4         | 18.2 |
|            |                                                                      |       |      | (M:415.4)     |      |
| CATC_HUMAN | Dipeptidyl peptidase 1 OS=Homo sapiens GN=CTSC PE=1 SV=2             | 51.8  | 6.6  | 53.8 (M:53.8) | 2.6  |
| CAP1_HUMAN | Adenylyl cyclase-associated protein 1 OS=Homo sapiens                | 51.9  | 9.1  | 79.9 (M:79.9) | 4.8  |
|            | GN=CAP1 PE=1 SV=5                                                    |       |      |               |      |
| CAMP_HUMAN | Cathelicidin antimicrobial peptide OS=Homo sapiens                   | 19.3  | 10.3 | 186.2         | 11.8 |
|            | GN=CAMP PE=1 SV=1                                                    |       |      | (M:186.2)     |      |
| CALX_HUMAN | Calnexin OS=Homo sapiens GN=CANX PE=1 SV=2                           | 67.5  | 4.3  | 86.0 (M:86.0) | 3.7  |
| CALR_HUMAN | Calreticulin OS=Homo sapiens GN=CALR PE=1 SV=1                       | 48.1  | 4.1  | 91.2 (M:91.2) | 14.9 |
| CALD1_HUMA | Caldesmon OS=Homo sapiens GN=CALD1 PE=1 SV=3                         | 93.2  | 5.5  | 32.3 (M:32.3) | 1.0  |
| N          |                                                                      |       |      |               |      |
| CALB1_HUMA | Calbindin OS=Homo sapiens GN=CALB1 PE=1 SV=2                         | 30.0  | 4.6  | 86.2 (M:86.2) | 5.7  |
| N          |                                                                      |       |      |               |      |
| CAH2_HUMAN | Carbonic anhydrase 2 OS=Homo sapiens GN=CA2 PE=1 SV=2                | 29.2  | 7.0  | 278.7         | 13.5 |
|            |                                                                      |       |      | (M:278.7)     |      |
| CAH1_HUMAN | Carbonic anhydrase 1 OS=Homo sapiens GN=CA1 PE=1 SV=2                | 28.9  | 6.7  | 32.3 (M:32.3) | 3.4  |

|                 |                                                                                             |       |      |                      |      |
|-----------------|---------------------------------------------------------------------------------------------|-------|------|----------------------|------|
| CAB45_HUMA<br>N | 45 kDa calcium-binding protein OS=Homo sapiens GN=SDF4<br>PE=1 SV=1                         | 41.8  | 4.6  | 45.4 (M:45.4)        | 2.8  |
| C1QC_HUMAN      | Complement C1q subcomponent subunit C OS=Homo sapiens<br>GN=C1QC PE=1 SV=3                  | 25.8  | 9.4  | 39.4 (M:39.4)        | 3.7  |
| BHMT1_HUMA<br>N | Betaine--homocysteine S-methyltransferase 1 OS=Homo<br>sapiens GN=BHMT PE=1 SV=2            | 45.0  | 6.7  | 353.7<br>(M:353.7)   | 19.5 |
| BGAL_HUMAN      | Beta-galactosidase OS=Homo sapiens GN=GLB1 PE=1 SV=2                                        | 76.0  | 6.1  | 27.1 (M:27.1)        | 1.5  |
| B2MG_HUMAN      | Beta-2-microglobulin OS=Homo sapiens GN=B2M PE=1<br>SV=1                                    | 13.7  | 6.1  | 896.0<br>(M:896.0)   | 44.5 |
| ATPO_HUMAN      | ATP synthase subunit O, mitochondrial OS=Homo sapiens<br>GN=ATP5O PE=1 SV=1                 | 23.3  | 10.5 | 97.0 (M:97.0)        | 22.5 |
| ATPK_HUMAN      | ATP synthase subunit f, mitochondrial OS=Homo sapiens<br>GN=ATP5J2 PE=2 SV=3                | 10.9  | 10.2 | 58.8 (M:58.8)        | 11.7 |
| ATPB_HUMAN      | ATP synthase subunit beta, mitochondrial OS=Homo sapiens<br>GN=ATP5B PE=1 SV=3              | 56.5  | 5.1  | 163.2<br>(M:163.2)   | 13.8 |
| ATPA_HUMAN      | ATP synthase subunit alpha, mitochondrial OS=Homo sapiens<br>GN=ATP5A1 PE=1 SV=1            | 59.7  | 9.6  | 121.5<br>(M:121.5)   | 6.3  |
| ATP5H_HUMA<br>N | ATP synthase subunit d, mitochondrial OS=Homo sapiens<br>GN=ATP5H PE=1 SV=3                 | 18.5  | 5.1  | 128.4<br>(M:128.4)   | 18.6 |
| AT1B1_HUMAN     | Sodium/potassium-transporting ATPase subunit beta-1<br>OS=Homo sapiens GN=ATP1B1 PE=1 SV=1  | 35.0  | 9.4  | 109.0<br>(M:109.0)   | 11.9 |
| AT1A1_HUMA<br>N | Sodium/potassium-transporting ATPase subunit alpha-1<br>OS=Homo sapiens GN=ATP1A1 PE=1 SV=1 | 112.8 | 5.2  | 72.2 (M:72.2)        | 1.9  |
| ASSY_HUMAN      | Argininosuccinate synthase OS=Homo sapiens GN=ASS1<br>PE=1 SV=2                             | 46.5  | 8.9  | 57.8 (M:57.8)        | 4.6  |
| ASAH1_HUMA<br>N | Acid ceramidase OS=Homo sapiens GN=ASAH1 PE=1 SV=5                                          | 44.6  | 8.6  | 106.2<br>(M:106.2)   | 5.3  |
| ARSF_HUMAN      | Arylsulfatase F OS=Homo sapiens GN=ARSF PE=1 SV=4                                           | 65.9  | 6.9  | 26.8 (M:26.8)        | 4.6  |
| ARPC4_HUMA<br>N | Actin-related protein 2/3 complex subunit 4 OS=Homo sapiens<br>GN=ARPC4 PE=1 SV=3           | 19.7  | 9.4  | 52.0 (M:52.0)        | 6.5  |
| ARP3_HUMAN      | Actin-related protein 3 OS=Homo sapiens GN=ACTR3 PE=1<br>SV=3                               | 47.3  | 5.5  | 67.5 (M:67.5)        | 6.7  |
| ARF1_HUMAN      | ADP-ribosylation factor 1 OS=Homo sapiens GN=ARF1 PE=1<br>SV=2                              | 20.7  | 6.4  | 59.4 (M:59.4)        | 9.9  |
| AQP2_HUMAN      | Aquaporin-2 OS=Homo sapiens GN=AQP2 PE=1 SV=1                                               | 28.8  | 6.5  | 110.1<br>(M:110.1)   | 4.1  |
| APOE_HUMAN      | Apolipoprotein E OS=Homo sapiens GN=APOE PE=1 SV=1                                          | 36.1  | 5.5  | 224.2<br>(M:224.2)   | 16.7 |
| APOD_HUMAN      | Apolipoprotein D OS=Homo sapiens GN=APOD PE=1 SV=1                                          | 21.3  | 4.9  | 594.3<br>(M:594.3)   | 36.0 |
| APOA4_HUMA<br>N | Apolipoprotein A-IV OS=Homo sapiens GN=APOA4 PE=1<br>SV=3                                   | 45.4  | 5.2  | 1086.4<br>(M:1086.4) | 62.1 |
| APOA1_HUMA<br>N | Apolipoprotein A-I OS=Homo sapiens GN=APOA1 PE=1<br>SV=1                                    | 30.8  | 5.5  | 345.4<br>(M:345.4)   | 28.1 |
| ANXA6_HUMA      | Annexin A6 OS=Homo sapiens GN=ANXA6 PE=1 SV=3                                               | 75.8  | 5.3  | 56.8 (M:56.8)        | 4.3  |

|            |                                                                                        |       |      |                   |      |  |
|------------|----------------------------------------------------------------------------------------|-------|------|-------------------|------|--|
| N          |                                                                                        |       |      |                   |      |  |
| ANXA5_HUMA | Annexin A5 OS=Homo sapiens GN=ANXA5 PE=1 SV=2                                          | 35.9  | 4.8  | 519.9             | 23.8 |  |
| N          |                                                                                        |       |      | (M:519.9)         |      |  |
| ANXA4_HUMA | Annexin A4 OS=Homo sapiens GN=ANXA4 PE=1 SV=4                                          | 35.9  | 5.8  | 664.8             | 30.1 |  |
| N          |                                                                                        |       |      | (M:664.8)         |      |  |
| ANXA2_HUMA | Annexin A2 OS=Homo sapiens GN=ANXA2 PE=1 SV=2                                          | 38.6  | 8.5  | 1103.1            | 45.4 |  |
| N          |                                                                                        |       |      | (M:1103.1)        |      |  |
| ANXA1_HUMA | Annexin A1 OS=Homo sapiens GN=ANXA1 PE=1 SV=2                                          | 38.7  | 6.7  | 173.5             | 18.5 |  |
| N          |                                                                                        |       |      | (M:173.5)         |      |  |
| ANX11_HUMA | Annexin A11 OS=Homo sapiens GN=ANXA11 PE=1 SV=1                                        | 54.4  | 8.5  | 448.6             | 24.0 |  |
| N          |                                                                                        |       |      | (M:448.6)         |      |  |
| ANT3_HUMAN | Antithrombin-III OS=Homo sapiens GN=SERPINC1 PE=1 SV=1                                 | 52.6  | 6.3  | 90.1 (M:90.1)     | 4.1  |  |
| ANGL7_HUMA | Angiopoietin-related protein 7 OS=Homo sapiens GN=ANGPTL7 PE=1 SV=1                    | 40.0  | 8.9  | 26.9 (M:26.9)     | 6.4  |  |
| N          |                                                                                        |       |      |                   |      |  |
| ANGL6_HUMA | Angiopoietin-related protein 6 OS=Homo sapiens GN=ANGPTL6 PE=1 SV=1                    | 51.7  | 9.6  | 48.5 (M:48.5)     | 8.7  |  |
| N          |                                                                                        |       |      |                   |      |  |
| ANGL2_HUMA | Angiopoietin-related protein 2 OS=Homo sapiens GN=ANGPTL2 PE=2 SV=1                    | 57.1  | 7.8  | 93.1 (M:93.1)     | 7.1  |  |
| N          |                                                                                        |       |      |                   |      |  |
| AMPN_HUMAN | Aminopeptidase N OS=Homo sapiens GN=ANPEP PE=1 SV=4                                    | 109.5 | 5.2  | 1535.4 (M:1535.4) | 23.5 |  |
| AMPE_HUMAN | Glutamyl aminopeptidase OS=Homo sapiens GN=ENPEP PE=1 SV=3                             | 109.2 | 5.2  | 64.1 (M:64.1)     | 1.3  |  |
| AMBP_HUMAN | Protein AMBP OS=Homo sapiens GN=AMBP PE=1 SV=1                                         | 39.0  | 5.9  | 1513.5 (M:1513.5) | 43.8 |  |
| ALDR_HUMAN | Aldose reductase OS=Homo sapiens GN=AKR1B1 PE=1 SV=3                                   | 35.8  | 6.6  | 154.7 (M:154.7)   | 12.3 |  |
| ALDOB_HUMA | Fructose-bisphosphate aldolase B OS=Homo sapiens GN=ALDOB PE=1 SV=2                    | 39.4  | 9.0  | 717.2 (M:717.2)   | 25.3 |  |
| N          |                                                                                        |       |      |                   |      |  |
| ALDOA_HUMA | Fructose-bisphosphate aldolase A OS=Homo sapiens GN=ALDOA PE=1 SV=2                    | 39.4  | 9.2  | 68.6 (M:68.6)     | 3.0  |  |
| N          |                                                                                        |       |      |                   |      |  |
| ALBU_HUMAN | Serum albumin OS=Homo sapiens GN=ALB PE=1 SV=2                                         | 69.3  | 5.9  | 2531.8 (M:2531.8) | 43.0 |  |
| AL1A1_HUMA | Retinal dehydrogenase 1 OS=Homo sapiens GN=ALDH1A1 PE=1 SV=2                           | 54.8  | 6.3  | 32.6 (M:32.6)     | 2.0  |  |
| N          |                                                                                        |       |      |                   |      |  |
| AK1A1_HUMA | Alcohol dehydrogenase [NADP(+)] OS=Homo sapiens GN=AKR1A1 PE=1 SV=3                    | 36.5  | 6.4  | 225.8 (M:225.8)   | 16.0 |  |
| N          |                                                                                        |       |      |                   |      |  |
| AHnk_HUMAN | Neuroblast differentiation-associated protein AHNAK OS=Homo sapiens GN=AHNAK PE=1 SV=2 | 628.7 | 5.7  | 90.3 (M:90.3)     | 0.4  |  |
| AGRIN_HUMA | Agrin OS=Homo sapiens GN=AGRN PE=1 SV=5                                                | 217.1 | 6.0  | 305.5 (M:305.5)   | 4.9  |  |
| N          |                                                                                        |       |      |                   |      |  |
| ADT2_HUMAN | ADP/ATP translocase 2 OS=Homo sapiens GN=SLC25A5 PE=1 SV=7                             | 32.8  | 10.2 | 59.2 (M:59.2)     | 5.7  |  |
| ACY1_HUMAN | Aminoacylase-1 OS=Homo sapiens GN=ACY1 PE=1 SV=1                                       | 45.9  | 5.7  | 334.0 (M:334.0)   | 10.5 |  |

|             |                                                                                                  |       |     |               |      |
|-------------|--------------------------------------------------------------------------------------------------|-------|-----|---------------|------|
| ACTN4_HUMAN | Alpha-actinin-4 OS=Homo sapiens GN=ACTN4 PE=1 SV=2                                               | 104.8 | 5.2 | 108.0         | 5.7  |
| N           |                                                                                                  |       |     | (M:108.0)     |      |
| ACTC_HUMAN  | Actin, alpha cardiac muscle 1 OS=Homo sapiens GN=ACTC1 PE=1 SV=1                                 | 42.0  | 5.1 | 825.6         | 24.7 |
|             |                                                                                                  |       |     | (M:825.6)     |      |
| ACTB_HUMAN  | Actin, cytoplasmic 1 OS=Homo sapiens GN=ACTB PE=1 SV=1                                           | 41.7  | 5.2 | 1574.9        | 50.7 |
|             |                                                                                                  |       |     | (M:1574.9)    |      |
| ACE_HUMAN   | Angiotensin-converting enzyme OS=Homo sapiens GN=ACE PE=1 SV=1                                   | 149.6 | 5.9 | 36.5 (M:36.5) | 1.0  |
| ACE2_HUMAN  | Angiotensin-converting enzyme 2 OS=Homo sapiens GN=ACE2 PE=1 SV=2                                | 92.4  | 5.3 | 46.0 (M:46.0) | 1.5  |
| ACADM_HUMAN | Medium-chain specific acyl-CoA dehydrogenase, mitochondrial OS=Homo sapiens GN=ACADM PE=1 SV=1   | 46.6  | 9.4 | 31.9 (M:31.9) | 7.4  |
| AN          |                                                                                                  |       |     |               |      |
| A2GL_HUMAN  | Leucine-rich alpha-2-glycoprotein OS=Homo sapiens GN=LRG1 PE=1 SV=2                              | 38.2  | 6.5 | 509.0         | 23.9 |
|             |                                                                                                  |       |     | (M:509.0)     |      |
| A2AP_HUMAN  | Alpha-2-antiplasmin OS=Homo sapiens GN=SERPINF2 PE=1 SV=3                                        | 54.5  | 5.9 | 35.8 (M:35.8) | 2.2  |
| A1BG_HUMAN  | Alpha-1B-glycoprotein OS=Homo sapiens GN=A1BG PE=1 SV=4                                          | 54.2  | 5.5 | 931.6         | 36.0 |
|             |                                                                                                  |       |     | (M:931.6)     |      |
| A1AT_HUMAN  | Alpha-1-antitrypsin OS=Homo sapiens GN=SERPINA1 PE=1 SV=3                                        | 46.7  | 5.3 | 898.7         | 25.8 |
|             |                                                                                                  |       |     | (M:898.7)     |      |
| A1AG1_HUMAN | Alpha-1-acid glycoprotein 1 OS=Homo sapiens GN=ORM1 PE=1 SV=1                                    | 23.5  | 4.8 | 405.0         | 27.9 |
| N           |                                                                                                  |       |     | (M:405.0)     |      |
| 6PGL_HUMAN  | 6-phosphogluconolactonase OS=Homo sapiens GN=PGLS PE=1 SV=2                                      | 27.5  | 5.7 | 101.8         | 29.8 |
|             |                                                                                                  |       |     | (M:101.8)     |      |
| 4F2_HUMAN   | 4F2 cell-surface antigen heavy chain OS=Homo sapiens GN=SLC3A2 PE=1 SV=3                         | 68.0  | 4.7 | 66.1 (M:66.1) | 1.9  |
| 2B19_HUMAN  | HLA class II histocompatibility antigen, DRB1-9 beta chain OS=Homo sapiens GN=HLA-DRB1 PE=1 SV=1 | 29.8  | 8.9 | 68.7 (M:68.7) | 7.1  |
| 1A01_HUMAN  | HLA class I histocompatibility antigen, A-1 alpha chain OS=Homo sapiens GN=HLA-A PE=1 SV=1       | 40.8  | 6.1 | 111.9         | 8.2  |
|             |                                                                                                  |       |     | (M:111.9)     |      |
| 1433Z_HUMAN | 14-3-3 protein zeta/delta OS=Homo sapiens GN=YWHAZ PE=1 SV=1                                     | 27.7  | 4.6 | 313.3         | 42.4 |
|             |                                                                                                  |       |     | (M:313.3)     |      |
| 1433E_HUMAN | 14-3-3 protein epsilon OS=Homo sapiens GN=YWHAE PE=1 SV=1                                        | 29.2  | 4.5 | 228.3         | 18.8 |
|             |                                                                                                  |       |     | (M:228.3)     |      |
| 1433B_HUMAN | 14-3-3 protein beta/alpha OS=Homo sapiens GN=YWHAB PE=1 SV=3                                     | 28.1  | 4.6 | 142.9         | 15.0 |
|             |                                                                                                  |       |     | (M:142.9)     |      |



Supplemental Table 2. Patient characteristics

|                                 | UC          | Comparison |                 |            | <i>p</i> |
|---------------------------------|-------------|------------|-----------------|------------|----------|
|                                 |             | UTI        | Prostate cancer | Normal     |          |
| Total, n                        | 129         | 17         | 25              | 20         |          |
| Age (yrs)                       | 67.34±11.35 | 64.41±7.68 | 63.65±8.85      | 69.88±9.96 | 0.178    |
| Gender, Male (%)                | 85 (65.9%)  | 7 (41.2%)  | 25 (100%)       | 11 (55%)   | 0.328    |
| Location at presentation, n (%) |             |            |                 |            |          |
| Bladder                         | 70 (54.3%)  | -          | -               | -          | -        |
| Ureter or Renal pelvis          | 59 (45.7%)  | -          | -               | -          | -        |
| Pathologic stage, n (%)         |             |            |                 |            |          |
| pTa/Tis/T1                      | 63 (48.8%)  | -          | -               | -          | -        |
| pT2                             | 30 (23.3%)  | -          | -               | -          | -        |
| pT3/T4                          | 36 (27.9%)  | -          | -               | -          | -        |
| Pathological grade, n (%)       |             |            |                 |            |          |
| Low                             | 37(28.7%)   | -          | -               | -          | -        |
| High                            | 92(71.3%)   | -          | -               | -          | -        |
| Tumor diameter, n (%)           |             |            |                 |            |          |
| <1cm                            | 29 (22.5%)  | -          | -               | -          | -        |
| 1-3cm                           | 74 (57.4%)  | -          | -               | -          | -        |
| ≥ 3cm                           | 26 (20.1%)  | -          | -               | -          | -        |
| Number of tumors, n (%)         |             |            |                 |            |          |
| Single                          | 48(37.2%)   | -          | -               | -          | -        |
| Multiple                        | 81(62.8%)   | -          | -               | -          | -        |
| Surgical Methods                |             |            |                 |            |          |
| TURBT                           | 68(52.7%)   | -          | -               | -          | -        |
| cystectomy                      | 15(11.6%)   | -          | -               | -          | -        |
| nephrourectomy                  | 46 (35.7%)  | -          | -               | -          | -        |
| Lymphovascular invasion, n(%)   |             |            |                 |            |          |
| Total                           | 65          | -          | -               | -          | -        |
| Positive                        | 18 (27.70%) | -          | -               | -          | -        |
| Negative                        | 47 (72.30%) | -          | -               | -          | -        |
| Lymph node metastasis           |             |            |                 |            |          |
| Positive                        | 10 (7.8%)   | -          | -               | -          | -        |
| Negative                        | 119 (92.2%) | -          | -               | -          | -        |
| Chemotherapy                    |             |            |                 |            |          |
| Intravesical                    | 69 (53.5%)  | -          | -               | -          | -        |
| adjuvant                        | 32 (24.8%)  | -          | -               | -          | -        |
| No                              | 28 (21.7%)  | -          | -               | -          | -        |
| Surgical margin, n (%)          |             |            |                 |            |          |
| Positive                        | 7 (5.4%)    | -          | -               | -          | -        |
| Negative                        | 122 (94.6%) | -          | -               | -          | -        |

UC: Urothelial cancer; UTI: urinary tract infection; TURBT: transurethral resection of bladder tumor

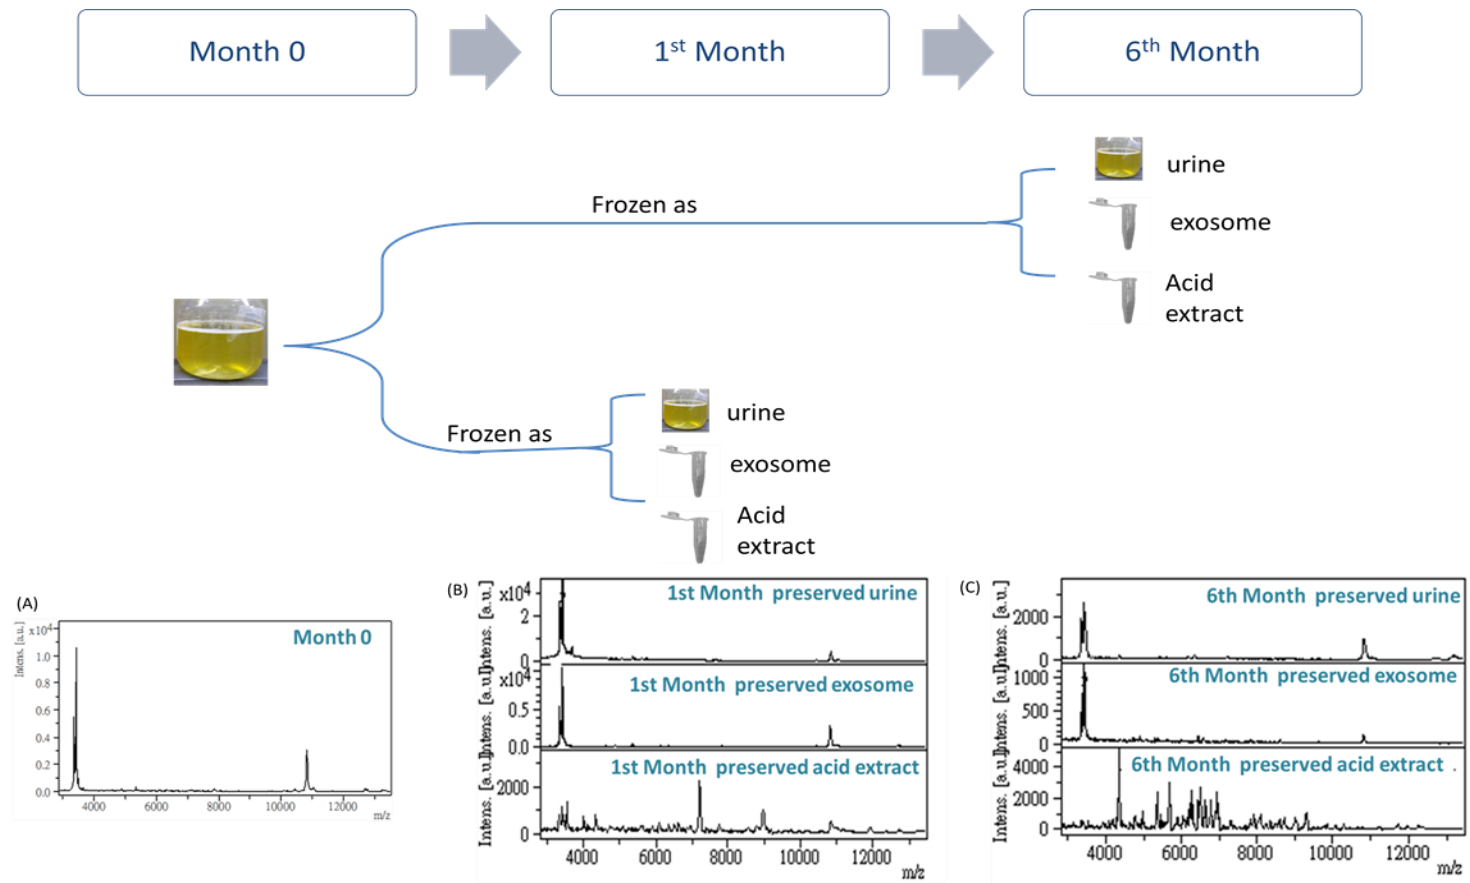

**Supplemental Figure 1. MALDI-TOF spectra of urine exosomes stored as urine, exosomes, or acid extract at (A) Month 0, (B) first month, and (C) sixth month.**

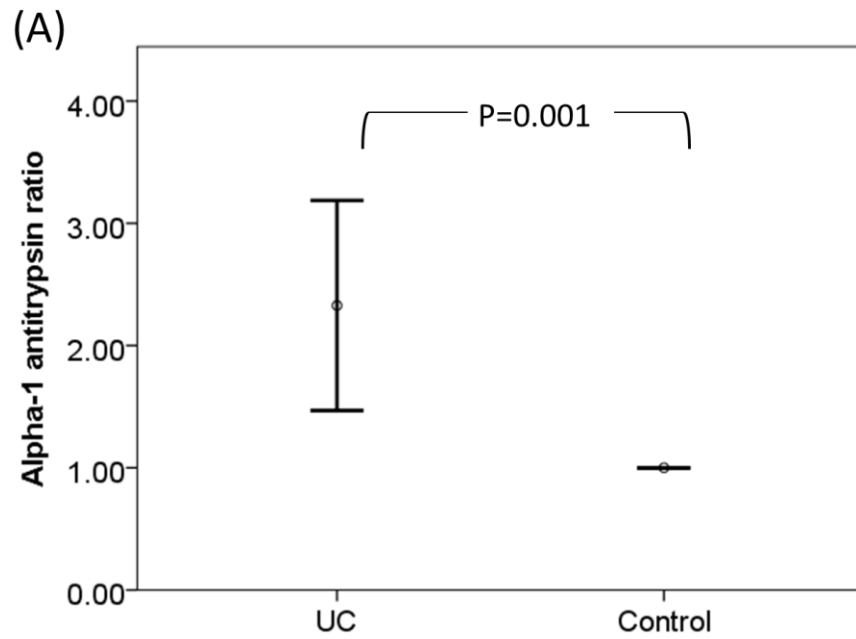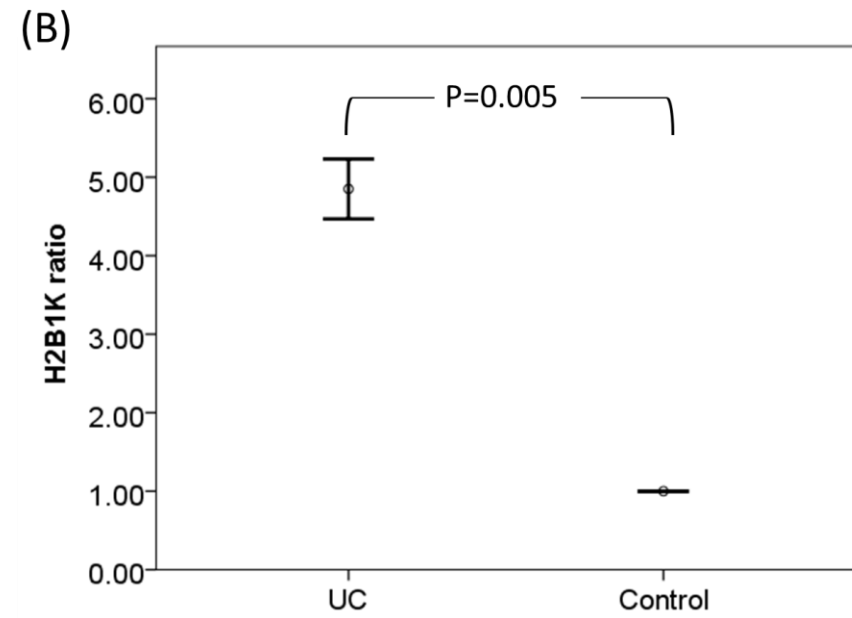

**Supplemental Figure 2. Quantitative comparison of the urinary exosome proteins (A) alpha 1-antitrypsin and (B) H2B1K between UC and control group**

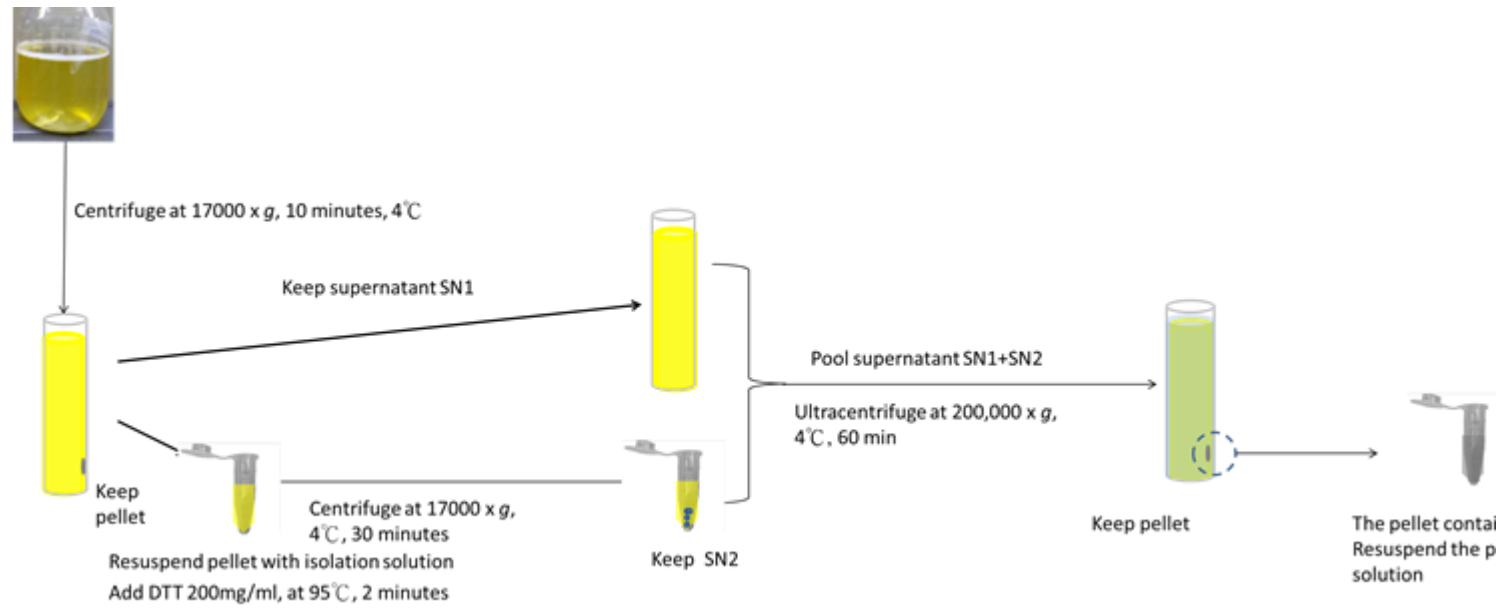

**Supplemental Figure 3. Protocol for isolating urinary microparticles.**

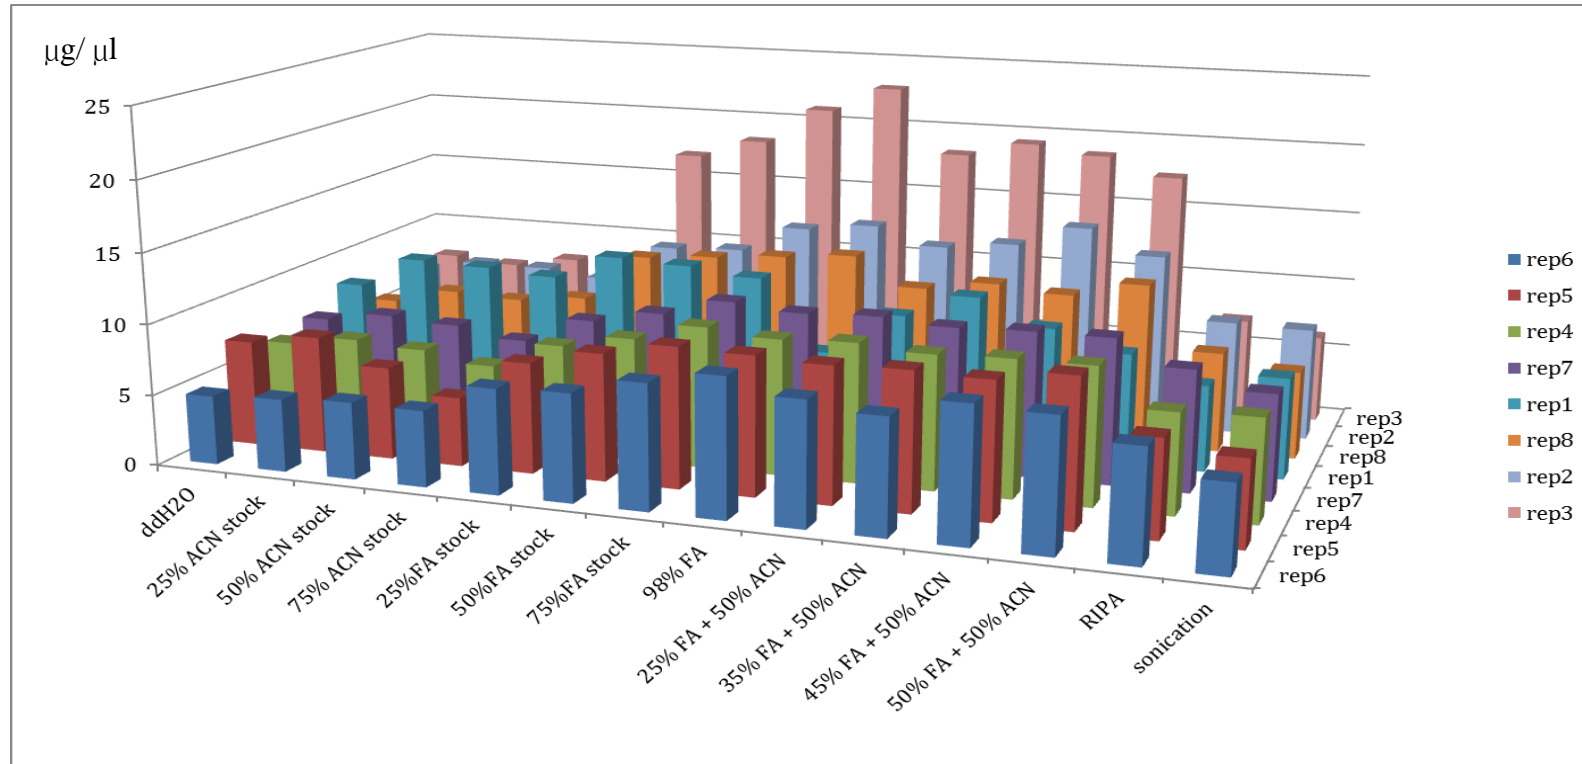

Supplemental Figure 4

This three-dimensional axis plot characterizes the biological replicates and technique replicates for evaluating extraction procedures: X axis represents 14 different extraction methods, Y axis is the concentration of extracted protein ( $\mu\text{g}/\mu\text{l}$ ), and Z axis is the biological replicate.

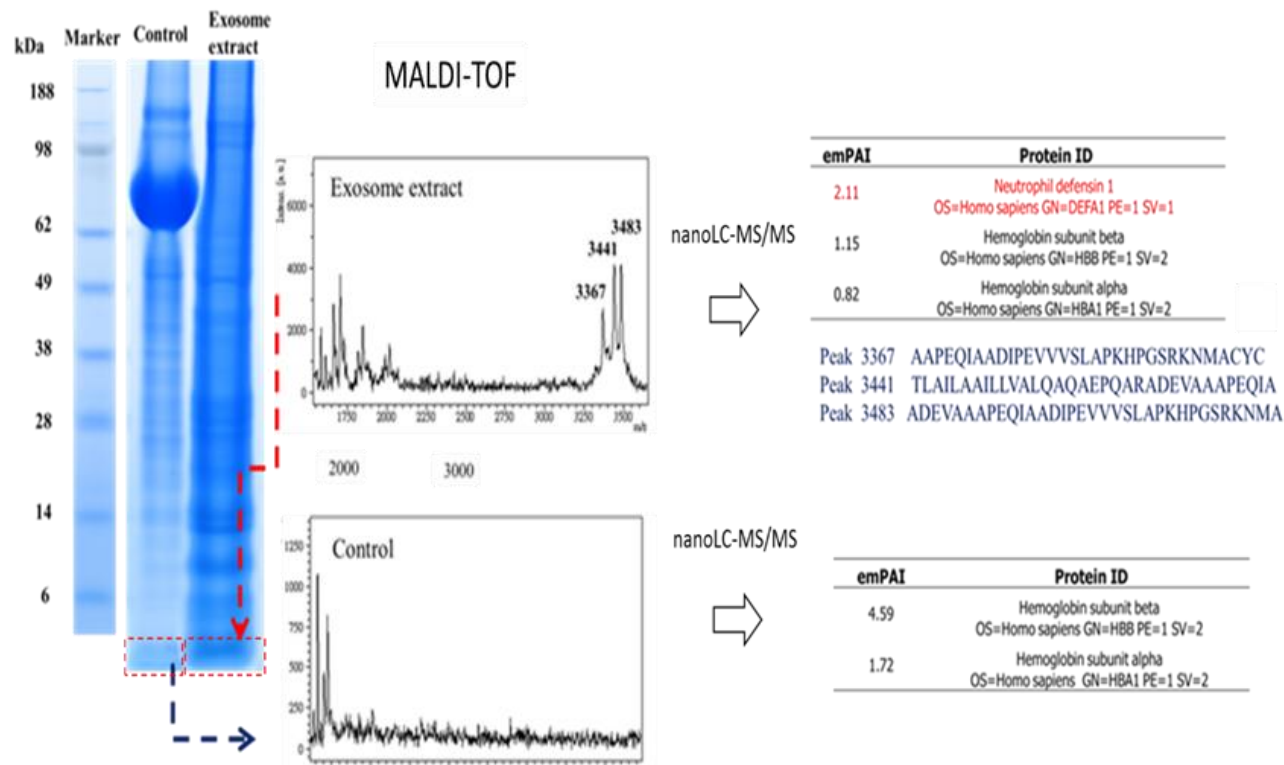

Supplemental Figure 5 The exosomes proteins and controls were both separated on 4%–12% Bis-Tris gels. Peptide bands of approximately 3000 Da were excised and extracted using 50% ACN/0.1% FA. The extracted peptides were analyzed through MALDI–TOF spectrometry to confirm the presence of peaks at  $m/z$  3367,  $m/z$  3441, and  $m/z$  3483, which were only detected in peptide bands from exosome extracts. Neutrophil defensin 1 was only identified in the excised peptide band from exosome extracts, the peptide fragments of Neutrophil Defensin 1 can also match with their detected mass on MALDI–TOF.
